# Supplementary material for: Effect of Sublethal Doses of Imidacloprid on the Biological Performance of Aphid Endoparasitoid Aphidius gifuensis (Hymenoptera: Aphidiidae) and Influence on Its Related Gene Expression
Source: Front Physiol. 2018 Dec 11;9:1729. doi: 10.3389/fphys.2018.01729 (PMC6297876; doi:10.3389/fphys.2018.01729)
Supplement: Datasheet 1 — Gene expression differences between IMD and CK. [file Data_Sheet_1.DOC]

gene_id	sample_readcount(CK)	sample_readcount(IMD)	sample_fpkm(CK)	sample_fpkm(IMD)	log2ratio(IMDvsCK)	q value(IMDvsCK)
Cluster-4190.0	1	0	1.25	0	#NAME?	1
Cluster-6487.0	0	8.1	0	0.43	Inf	1
Cluster-9767.15053	116.54	95.27	10.41	7.86	-0.3594	1
Cluster-9767.15052	1	0	13.29	0	#NAME?	1
Cluster-9767.15051	58.98	21	18.39	6.06	-1.5492	1
Cluster-1212.0	1	4	0.24	0.89	1.9411	1
Cluster-9767.15057	3	0	1.02	0	#NAME?	1
Cluster-9767.15056	2.13	1.63	2.19	1.53	-0.058894	1
Cluster-9767.15055	70.71	62.19	9.83	7.99	-0.25444	1
Cluster-9767.15054	182.35	148.9	19.62	14.81	-0.34752	1
Cluster-9767.15059	4	5	0.81	0.93	0.26303	1
Cluster-9767.15058	107.44	41.05	15.41	5.44	-1.4428	1
Cluster-7476.0	3	2	1.04	0.64	-0.64386	1
Cluster-1899.0	0	0	0	0	NA	NA
Cluster-1899.1	0	0	0	0	NA	NA
Cluster-9767.14988	0	0	0	0	NA	NA
Cluster-5283.0	0	1.04	0	0.27	Inf	1
Cluster-9767.14986	2	6	0.45	1.24	1.5261	1
Cluster-9767.14987	605.65	788.08	14.72	17.69	0.31998	1
Cluster-9767.14984	2	1	39.76	14.2	-1.0589	1
Cluster-9767.14985	0	0	0	0	NA	NA
Cluster-6830.0	6	12	0.59	1.09	0.94111	1
Cluster-9767.14983	0	1	0	3.98	Inf	1
Cluster-9767.14980	0	0	0	0	NA	NA
Cluster-9767.14981	1	12	0.72	7.97	3.5261	1
Cluster-4711.0	0	0	0	0	NA	NA
Cluster-9767.15866	426	399	17.67	15.28	-0.15336	1
Cluster-2511.0	0	0	0	0	NA	NA
Cluster-865.0	0	2	0	2.47	Inf	1
Cluster-4723.0	1	2	0.64	1.19	0.94111	1
Cluster-4500.0	0	1	0	0.85	Inf	1
Cluster-924.0	7	12	0.64	1.02	0.71871	1
Cluster-9767.9619	235	213	10.78	9.03	-0.2007	1
Cluster-6497.0	1	7	0.34	2.2	2.7485	1
Cluster-8715.0	0	0	0	0	NA	NA
Cluster-4187.0	3	4	2.28	2.81	0.35614	1
Cluster-9767.40355	3.79	3.1	0.4	0.3	-0.47393	1
Cluster-6905.0	0	0	0	0	NA	NA
Cluster-4618.0	0	0	0	0	NA	NA
Cluster-9767.13068	509	583	44.69	47.29	0.13694	1
Cluster-9767.13069	28	23	36.78	27.48	-0.34269	1
Cluster-9767.9820	2	0	0.92	0	#NAME?	1
Cluster-9767.9821	0	0	0	0	NA	NA
Cluster-9767.9822	0	0	0	0	NA	NA
Cluster-9767.13063	5	1	11.09	1.96	-2.3808	1
Cluster-9767.13064	1	2	24.13	33.77	0.94111	1
Cluster-9767.13065	14	15	4.98	4.94	0.040642	1
Cluster-9767.13066	58	46	9.67	7.09	-0.39331	1
Cluster-9767.13067	74.91	54	11.58	7.72	-0.53282	1
Cluster-9382.0	4	3	1.56	1.08	-0.47393	1
Cluster-9767.38719	11	16	7.83	10.52	0.48167	1
Cluster-9767.18581	5	3	15.18	7.88	-0.79586	1
Cluster-6181.0	0	0	0	0	NA	NA
Cluster-9767.17989	1930	2031	189.09	183.86	0.014696	1
Cluster-9767.17988	0	1	0	4.34	Inf	1
Cluster-9767.17987	0	0	0	0	NA	NA
Cluster-9767.17986	20	33	3.74	5.7	0.66357	1
Cluster-9767.17985	15.84	33.68	1.56	3.07	1.0286	1
Cluster-9767.17984	775.88	513.45	14.14	8.64	-0.65599	1
Cluster-9767.17983	157.56	88.87	4.78	2.49	-0.88694	1
Cluster-9767.17982	1856	2463	68.14	83.52	0.34933	1
Cluster-9767.17981	30	39	12.08	14.54	0.31962	1
Cluster-9767.17980	135.5	219.99	1.87	2.81	0.64565	1
Cluster-2263.0	8	6	1.32	0.91	-0.47393	1
Cluster-9767.38718	66	74.55	2.11	2.2	0.12553	1
Cluster-6407.0	0	0	0	0	NA	NA
Cluster-2332.0	0	0	0	0	NA	NA
Cluster-9767.15050	90.04	107.32	11.46	12.62	0.19072	1
Cluster-9767.923	0	0	0	0	NA	NA
Cluster-9767.922	11	34	3.43	9.81	1.5691	1
Cluster-9767.921	164	192	8.41	9.1	0.16852	1
Cluster-9767.920	0	1	0	19.35	Inf	1
Cluster-9767.927	3	0	0.98	0	#NAME?	1
Cluster-9767.926	7	6	1.34	1.06	-0.28129	1
Cluster-9767.925	1	2	0.43	0.79	0.94111	1
Cluster-9767.924	0	0	0	0	NA	NA
Cluster-9767.929	20	15	17.3	11.95	-0.47393	1
Cluster-9767.928	5.5	6.94	0.48	0.56	0.42653	1
Cluster-9767.29140	146.15	307.54	6.37	12.38	1.0181	1
Cluster-9767.41334	48	26	5.84	2.92	-0.94342	1
Cluster-2308.0	4	4	0.62	0.57	-0.058894	1
Cluster-8218.0	0	3	0	0.84	Inf	1
Cluster-9900.1	2	0	10.53	0	#NAME?	1
Cluster-4739.0	5	3	4.22	2.33	-0.79586	1
Cluster-1728.0	2	3	2.97	4.03	0.52607	1
Cluster-9767.17369	5	5	7.83	7.07	-0.058894	1
Cluster-9767.17368	4	4	5.83	5.28	-0.058894	1
Cluster-9767.17363	129.39	272.5	8.73	16.98	1.0173	1
Cluster-9767.17362	131.45	202.39	2.61	3.72	0.56589	1
Cluster-9767.17361	48	47	11.69	10.59	-0.089267	1
Cluster-9767.29141	0	1	0	1.34	Inf	1
Cluster-2539.0	47	36	4.25	3.01	-0.44356	1
Cluster-9767.17366	0	0	0	0	NA	NA
Cluster-9767.17365	25.67	25.11	3.43	3.1	-0.11548	1
Cluster-9767.17364	91.24	68.47	6.58	4.56	-0.47923	1
Cluster-9767.21915	3088.13	2760.19	93.91	77.52	-0.2209	1
Cluster-9767.21914	1745	1520	35.42	28.49	-0.25805	1
Cluster-9767.21917	1	0	19.88	0	#NAME?	1
Cluster-9767.21916	1606	1837	60.9	64.34	0.13499	1
Cluster-9767.21911	2	4	17.8	27.77	0.94111	1
Cluster-9767.21910	343	298	428.89	339.59	-0.26179	1
Cluster-9767.21913	0	0	0	0	NA	NA
Cluster-9767.21912	400	311	341.83	244.79	-0.42198	1
Cluster-9767.21919	540.53	860.07	42.89	63.04	0.60981	1
Cluster-9767.21918	131	208	84.24	123.67	0.60812	1
Cluster-9180.0	1	0	0.54	0	#NAME?	1
Cluster-5117.0	0	0	0	0	NA	NA
Cluster-9767.12906	2	0	0.77	0	#NAME?	1
Cluster-1752.0	11	38	1.07	3.43	1.7296	1
Cluster-9767.6043	2	1	1.52	0.7	-1.0589	1
Cluster-9767.26501	34	44	27.04	32.28	0.31308	1
Cluster-9767.12856	137	152	12.72	13.03	0.091002	1
Cluster-6617.3	1	3	0.44	1.21	1.5261	1
Cluster-9767.12854	317	408	10.09	11.99	0.30519	1
Cluster-9767.12855	10	11	7.04	7.16	0.07861	1
Cluster-9767.12852	0	0	0	0	NA	NA
Cluster-9767.12853	4	22	1.1	5.6	2.4005	1
Cluster-9767.12850	0	0	0	0	NA	NA
Cluster-6617.2	1	1	3.88	3.29	-0.058894	1
Cluster-9767.2386	0	0	0	0	NA	NA
Cluster-9767.14989	455.51	913.43	10.76	19.93	0.94269	0.79941
Cluster-9767.12858	176	161	24.68	20.87	-0.18741	1
Cluster-9767.12859	62.96	69.34	3.5	3.57	0.072351	1
Cluster-3575.1	4	0	1.9	0	#NAME?	1
Cluster-9767.33502	55	61	7.16	7.34	0.090484	1
Cluster-9767.26729	1229	1734	194.22	253.32	0.43773	1
Cluster-3003.0	7	1	8.09	1.06	-2.8662	1
Cluster-9767.14982	531	612	27.82	29.62	0.14593	1
Cluster-9767.26728	136.47	183.8	9.31	11.59	0.37721	1
Cluster-1319.1	1	0	6.65	0	#NAME?	1
Cluster-1319.0	0	0	0	0	NA	NA
Cluster-9767.5341	0	1	0	2.23	Inf	1
Cluster-9767.26726	229.38	234.5	8.49	8.02	-0.027733	1
Cluster-9767.16936	31	30	6.8	6.08	-0.1062	1
Cluster-9767.23933	649	653	16.26	15.11	-0.050029	1
Cluster-9767.36599	0	0	0	0	NA	NA
Cluster-9767.36598	0	1.85	0	0.74	Inf	1
Cluster-9767.5342	0	1	0	20.28	Inf	1
Cluster-9767.36591	35.12	62.96	1.91	3.16	0.7891	1
Cluster-9767.36590	0.48	0	4.57	0	NA	NA
Cluster-9767.36593	4	2	0.88	0.41	-1.0589	1
Cluster-9767.36592	17	31	2.08	3.51	0.80784	1
Cluster-9767.36595	15	21	5.82	7.54	0.42653	1
Cluster-9767.36594	3	0	88.78	0	#NAME?	1
Cluster-9767.36597	0	0	0	0	NA	NA
Cluster-9767.36596	0	2	0	19.85	Inf	1
Cluster-9767.33804	67.89	105.59	2.21	3.17	0.58156	1
Cluster-9767.5849	41	69	5.16	8.02	0.69208	1
Cluster-9767.5347	12.15	0	4.2	0	#NAME?	0.80656
Cluster-6532.0	0	1	0	6.94	Inf	1
Cluster-9767.5346	0	1	0	2.9	Inf	1
Cluster-9767.33806	3	4	25.71	26.85	0.35614	1
Cluster-9767.33807	0	7	0	3.24	Inf	1
Cluster-9767.33800	0	0	0	0	NA	NA
Cluster-9767.33801	2	1	7.14	3.05	-1.0589	1
Cluster-9767.36830	0	26.62	0	3.2	Inf	0.11147
Cluster-9767.33803	47.39	0	1.51	0	#NAME?	0.0054494
Cluster-9767.5840	0	5	0	9.81	Inf	1
Cluster-9767.5841	2.84	6.52	0.72	1.52	1.1635	1
Cluster-2879.0	11	13	0.88	0.96	0.18211	1
Cluster-3420.0	1	2	0.62	1.14	0.94111	1
Cluster-1294.0	0	4.71	0	1.2	Inf	1
Cluster-9767.10076	458.7	359.99	27.03	19.59	-0.40939	1
Cluster-7747.0	10	5	0.93	0.43	-1.0589	1
Cluster-7318.0	6	4	2.93	1.81	-0.64386	1
Cluster-4624.0	0	0	0	0	NA	NA
Cluster-2751.0	10.13	11.31	0.69	0.71	0.07861	1
Cluster-2751.1	29.15	22.48	2.44	1.74	-0.45744	1
Cluster-9767.35347	0	0	0	0	NA	NA
Cluster-7230.0	2	6	0.77	2.14	1.5261	1
Cluster-9767.21304	0	3	0	12.29	Inf	1
Cluster-9767.9715	10	4	1.91	0.71	-1.3808	1
Cluster-9767.21305	1853	2216	65.24	72.05	0.1992	1
Cluster-9767.9712	74	63	18.9	14.88	-0.29107	1
Cluster-9325.0	1	2	0.43	0.8	0.94111	1
Cluster-9325.1	0	0	0	0	NA	NA
Cluster-9767.9713	13	15	16.52	17.36	0.14756	1
Cluster-9767.29469	140.74	156.02	31.84	32.65	0.086957	1
Cluster-9767.21307	998	1046	62.71	60.71	0.0088774	1
Cluster-9767.21300	13	8	19.63	10.92	-0.75933	1
Cluster-1421.0	79.34	47.05	11.4	6.25	-0.80809	1
Cluster-4364.2	0	0	0	0	NA	NA
Cluster-9767.11038	6	10	5.32	8.17	0.67807	1
Cluster-4364.0	0	2	0	11.77	Inf	1
Cluster-9767.14048	14.91	16.55	1.97	2.02	0.12168	1
Cluster-9767.21302	888	233	477.21	115.88	-1.9891	0.0011457
Cluster-9767.38624	13	18	1.34	1.72	0.41059	1
Cluster-9767.11031	42.09	13.14	2.91	0.84	-1.7508	1
Cluster-9767.14042	57.65	64.93	1.02	1.06	0.10549	1
Cluster-9767.14041	13	8	2.06	1.17	-0.75933	1
Cluster-9767.11032	0	0	0	0	NA	NA
Cluster-9767.11035	694	632	30.77	25.88	-0.1939	1
Cluster-9767.14046	2	3	2.86	3.89	0.52607	1
Cluster-9767.11037	7	8	3.18	3.36	0.13375	1
Cluster-9767.11036	5.32	10.91	2.3	4.37	1.0786	1
Cluster-9767.32948	110	94	8.71	6.87	-0.28566	1
Cluster-9767.37363	35	55	5.31	7.71	0.59318	1
Cluster-9767.20435	0	1	0	10.31	Inf	1
Cluster-9767.13899	9	7	10.4	7.39	-0.42146	1
Cluster-9767.13898	0	0	0	0	NA	NA
Cluster-2622.0	1.09	5.42	0.66	3.02	2.263	1
Cluster-9767.9718	3	5	2.05	3.15	0.67807	1
Cluster-9767.37248	36	48	3.75	4.62	0.35614	1
Cluster-9767.37249	14	16	6.22	6.59	0.13375	1
Cluster-9767.37246	0	0	0	0	NA	NA
Cluster-9767.37247	10.93	6.88	0.51	0.3	-0.71097	1
Cluster-9767.37244	31.72	38.91	3.33	3.77	0.22651	1
Cluster-9767.37245	37.5	43.53	1.04	1.11	0.19108	1
Cluster-9767.13895	16.81	104.39	2.75	15.76	2.5541	0.15715
Cluster-9767.13894	19.78	47.43	0.43	0.94	1.1738	1
Cluster-9767.37240	10	24	2.59	5.74	1.2041	1
Cluster-9767.13896	0	0	0	0	NA	NA
Cluster-9767.30625	939.31	1058.2	42.75	44.49	0.11325	1
Cluster-9767.30624	349	277	17.45	12.79	-0.39223	1
Cluster-9767.30627	21	28	0.87	1.07	0.35614	1
Cluster-9767.30626	2	1	1.42	0.66	-1.0589	1
Cluster-9767.30621	0	0	0	0	NA	NA
Cluster-9250.0	24	29	2.06	2.3	0.21412	1
Cluster-9767.30623	38.9	52	12.07	14.93	0.35614	1
Cluster-9767.30622	104.91	68.65	3.45	2.09	-0.66461	1
Cluster-9767.7273	26.84	19.5	0.91	0.61	-0.56585	1
Cluster-9767.30629	4	2	2.11	0.98	-1.0589	1
Cluster-9767.30628	0	0	0	0	NA	NA
Cluster-9767.34535	39	52	8.4	10.36	0.35614	1
Cluster-9767.34534	97.75	74.99	2.98	2.11	-0.44478	1
Cluster-9767.34537	25	30	2.71	3.01	0.20414	1
Cluster-9767.34536	50.79	27.59	4.46	2.24	-0.92396	1
Cluster-9767.34531	0	0	0	0	NA	NA
Cluster-9767.34530	1.74	3.8	4.34	8.32	0.94111	1
Cluster-9767.34533	28	33	5.84	6.36	0.17815	1
Cluster-9767.34532	68	54	9.58	7.03	-0.39147	1
Cluster-1008.1	0	0	0	0	NA	NA
Cluster-9767.38056	48	57	2.54	2.78	0.18903	1
Cluster-9767.34539	11	13	7.07	7.73	0.18211	1
Cluster-9767.34538	23	28	6.07	6.84	0.2249	1
Cluster-9767.22396	158.08	334.34	2.54	4.96	1.021	1
Cluster-9767.22397	5788	6979	4349.91	4841	0.21106	1
Cluster-9767.19248	324	291	12.95	10.74	-0.21387	1
Cluster-9767.22395	21708	17451	1832.37	1360.95	-0.37381	1
Cluster-9767.22392	6805	7752	199.85	210.26	0.12908	1
Cluster-9767.22393	5871.7	6039.21	425.9	404.68	-0.018436	1
Cluster-5046.0	0	1	0	5.03	Inf	1
Cluster-9767.22391	844	689	13.26	10	-0.35163	1
Cluster-9767.19242	0	0	0	0	NA	NA
Cluster-9767.19243	953	1165	55.94	63.17	0.23089	1
Cluster-9767.19240	7	10	1.26	1.66	0.45568	1
Cluster-9767.19241	3	2	0.92	0.57	-0.64386	1
Cluster-9767.19246	469	545	37.87	40.66	0.15777	1
Cluster-9767.19247	784	1033	138	168.1	0.33902	1
Cluster-9767.22398	74	102	17.62	22.47	0.40408	1
Cluster-9767.19245	171.79	235.46	9.31	11.79	0.39136	1
Cluster-9767.38438	10	7	2.34	1.51	-0.57347	1
Cluster-9767.38439	3.19	4.43	0.73	0.94	0.35614	1
Cluster-9767.23669	4126	5592	146.72	183.66	0.37973	1
Cluster-9767.29157	0	1	0	6.71	Inf	1
Cluster-9767.38430	0	0	0	0	NA	NA
Cluster-9767.23664	176.44	285.1	13.53	20.19	0.63649	1
Cluster-9767.38432	0	0.8	0	0.54	Inf	1
Cluster-9767.38433	17	14	7.35	5.61	-0.339	1
Cluster-9767.23661	50.66	112.48	1.66	3.41	1.076	1
Cluster-9767.23660	564	517	24.95	21.13	-0.18442	1
Cluster-9767.38436	2	5	1.63	3.75	1.263	1
Cluster-9767.23662	4	9	0.79	1.65	1.111	1
Cluster-9767.30199	5	4	2.98	2.21	-0.38082	1
Cluster-9767.30198	5	9	4.49	7.44	0.7891	1
Cluster-9767.30197	777.24	699.2	12.7	10.55	-0.21152	1
Cluster-9767.30196	101.07	67.01	2.95	1.81	-0.65102	1
Cluster-9767.30195	9.25	41.61	0.25	1.03	2.1635	1
Cluster-9767.30194	356	417	19.59	21.2	0.16928	1
Cluster-9767.30193	78.89	41.8	1.92	0.94	-0.97036	1
Cluster-9767.30192	79.68	99.57	2	2.3	0.26303	1
Cluster-9767.30191	411.73	592.81	19.84	26.38	0.46649	1
Cluster-9767.30190	2	5	0.79	1.82	1.263	1
Cluster-9767.25627	306	308	20.31	18.89	-0.049495	1
Cluster-9767.25626	53	33	10.11	5.82	-0.74242	1
Cluster-9767.25625	108	202	32.56	56.36	0.84443	1
Cluster-9767.25624	0	1	0	12.05	Inf	1
Cluster-9767.25623	165.42	254.03	20.28	28.78	0.56347	1
Cluster-9767.25622	437.6	376.91	36.5	29.05	-0.27526	1
Cluster-9767.25621	1018	891	31.89	25.78	-0.25113	1
Cluster-9767.25620	32	47	3.71	5.04	0.4957	1
Cluster-9767.38075	431.91	243.81	16.46	8.58	-0.88304	1
Cluster-9767.25629	0	0	0	0	NA	NA
Cluster-9767.25628	51	58	8.24	8.67	0.12666	1
Cluster-7464.0	3	1	0.9	0.28	-1.6439	1
Cluster-9767.31468	12	14	2.35	2.53	0.1635	1
Cluster-9767.19798	232	213	32.39	27.48	-0.18217	1
Cluster-3942.0	6.69	4.67	2.56	1.66	-0.54432	1
Cluster-1276.0	2	3	0.78	1.08	0.52607	1
Cluster-9767.19794	227	231	11.2	10.53	-0.033693	1
Cluster-9767.19795	11	20	3.93	6.62	0.8036	1
Cluster-9767.19796	3	3	2.14	1.97	-0.058894	1
Cluster-9767.19797	3109.18	4598.37	144.63	197.57	0.50566	1
Cluster-9767.19790	0	4.76	0	0.91	Inf	1
Cluster-9767.19791	37	42	23.79	24.97	0.12397	1
Cluster-9767.19792	87.98	112	10.4	12.24	0.28903	1
Cluster-9767.19793	123.69	127.06	11.95	11.34	-0.024405	1
Cluster-5034.0	8	14	1.05	1.7	0.74846	1
Cluster-6360.1	0	0	0	0	NA	NA
Cluster-9767.38294	15	23	1.87	2.65	0.55778	1
Cluster-9767.38295	35	18	2.88	1.37	-1.0183	1
Cluster-9767.38296	30.73	63.71	1.02	1.95	0.98691	1
Cluster-9767.35669	68.81	92.85	5.73	7.15	0.37174	1
Cluster-9767.38290	69	78	10.61	11.09	0.11798	1
Cluster-9767.38291	4	0	79.52	0	#NAME?	1
Cluster-9284.0	1	0	2.03	0	#NAME?	1
Cluster-9767.38293	0	4	0	2.09	Inf	1
Cluster-9767.35662	0	1	0	1.01	Inf	1
Cluster-9767.35663	0	0	0	0	NA	NA
Cluster-9767.35660	18	21	3.53	3.81	0.1635	1
Cluster-9767.35661	26.63	13.38	2.71	1.26	-1.1133	1
Cluster-9767.38298	8	2	1.69	0.39	-2.0589	1
Cluster-9767.35667	108	79	7.49	5.06	-0.51	1
Cluster-9767.35664	4	6	2.94	4.07	0.52607	1
Cluster-9767.3043	0	0.79	0	0.08	Inf	1
Cluster-9767.42123	1	5	0.74	3.43	2.263	1
Cluster-9767.12071	170	151	8.96	7.35	-0.22988	1
Cluster-9767.12072	0	0	0	0	NA	NA
Cluster-9767.42120	4.65	7.8	0.61	0.95	0.61918	1
Cluster-9767.12074	1	1	5.1	4.21	-0.058894	1
Cluster-9767.12075	44.31	39.72	1.91	1.58	-0.1964	1
Cluster-9767.12076	2	0	5.62	0	#NAME?	1
Cluster-9767.12077	33	42	3.49	4.11	0.28903	1
Cluster-9767.12078	9.44	2.59	5.84	1.48	-1.6439	1
Cluster-9767.12079	3	12	2.6	9.56	1.9411	1
Cluster-9767.42129	1	0	6.01	0	#NAME?	1
Cluster-9767.42128	3.05	5.28	0.52	0.84	0.67807	1
Cluster-9767.39749	4	2	3.84	1.76	-1.0589	1
Cluster-9016.0	58	62	3.36	3.32	0.037322	1
Cluster-9767.29706	6	6	20.82	17.83	-0.058894	1
Cluster-9767.10626	22	10	8.14	3.42	-1.1964	1
Cluster-9767.39741	3.69	0	0.52	0	#NAME?	1
Cluster-9767.39740	49	52	8.82	8.65	0.026836	1
Cluster-9767.39743	22.31	16.24	4.36	2.94	-0.51833	1
Cluster-9767.39742	0	22.76	0	2.84	Inf	0.19212
Cluster-9767.39745	0	0	0	0	NA	NA
Cluster-9767.39744	0	0	0	0	NA	NA
Cluster-9767.39747	0	0	0	0	NA	NA
Cluster-9767.39746	244	211	11.82	9.44	-0.26853	1
Cluster-9767.22532	12	8	7.03	4.34	-0.64386	1
Cluster-9767.22533	898	783	47.13	37.96	-0.2566	1
Cluster-9767.22530	685.49	719.05	228.35	221.69	0.010994	1
Cluster-9767.22531	1765	2079	59.21	64.41	0.17733	1
Cluster-9767.22536	366	586	55.62	82.32	0.62016	1
Cluster-9767.22537	123.07	161.89	1.91	2.32	0.33844	1
Cluster-9767.22534	4837	5244	166.41	166.62	0.057661	1
Cluster-9767.22535	2887.65	2167.47	69.41	48.11	-0.47327	1
Cluster-9767.31572	217.82	161.96	14.49	9.95	-0.48723	1
Cluster-9767.31573	99.15	95.11	7.31	6.48	-0.11839	1
Cluster-9767.31570	48.99	21.88	1.56	0.64	-1.2142	1
Cluster-9767.31571	30	36	28.78	31.73	0.20414	1
Cluster-9767.31576	70.06	166	11.07	24.25	1.1869	1
Cluster-9767.31577	35	28	10.21	7.56	-0.38082	1
Cluster-9767.31574	116.44	134.6	11.25	12.02	0.15994	1
Cluster-9767.31575	5	2	0.82	0.3	-1.3808	1
Cluster-9767.21294	1528.49	1215.32	31.91	23.43	-0.38958	1
Cluster-7278.0	2	9	0.27	1.11	2.111	1
Cluster-6115.0	0	0	0	0	NA	NA
Cluster-6115.1	0	0	0	0	NA	NA
Cluster-1830.0	0	0	0	0	NA	NA
Cluster-5883.1	1	2	0.8	1.47	0.94111	1
Cluster-5883.0	2.96	10.74	0.32	1.07	1.8156	1
Cluster-2028.0	0	0	0	0	NA	NA
Cluster-9767.29463	16.86	30.08	1	1.65	0.76053	1
Cluster-9767.1855	24.71	25.56	7.9	7.56	-0.0023102	1
Cluster-9767.18689	306.7	333.89	30.52	30.7	0.062716	1
Cluster-5544.0	8	1	2.94	0.34	-3.0589	1
Cluster-9767.15491	1061.73	1255.48	22.46	24.53	0.18201	1
Cluster-1560.0	9	6	2.13	1.31	-0.64386	1
Cluster-9767.18685	11	23	6.39	12.35	1.0052	1
Cluster-9767.18684	82.63	96.34	6.59	7.1	0.15103	1
Cluster-9767.18687	128	127	11.85	10.86	-0.070209	1
Cluster-9767.18686	7	8	3.07	3.25	0.13375	1
Cluster-9767.18681	88	107	24.55	27.62	0.22314	1
Cluster-9767.18680	52.54	45.44	4.23	3.38	-0.29496	1
Cluster-9767.18683	1	8	1.99	14.17	2.9411	1
Cluster-9767.18682	19.61	0	0.39	0	#NAME?	0.2417
Cluster-9767.29623	108.44	99.02	3.79	3.19	-0.18442	1
Cluster-9767.18536	999.72	1000.04	32.54	30.06	-0.058894	1
Cluster-9767.29621	37	53	3.18	4.21	0.45957	1
Cluster-9767.13302	402.78	482.9	8.78	9.72	0.20235	1
Cluster-9767.29627	160	171	66.09	65.39	0.037031	1
Cluster-9767.13304	12	26	4.1	8.23	1.0566	1
Cluster-9767.13307	1	0	2.37	0	#NAME?	1
Cluster-9767.18530	0	1	0	11.13	Inf	1
Cluster-9767.13309	7	16.78	4.25	9.43	1.2212	1
Cluster-9767.13308	6	9	8.74	11.87	0.52607	1
Cluster-9767.29629	354.44	256.81	17.63	11.8	-0.52087	1
Cluster-9767.29628	1084	1134	29.99	28.97	0.0061622	1
Cluster-9767.1854	0	1	0	7.43	Inf	1
Cluster-9767.18539	148	129	52.9	42.68	-0.25712	1
Cluster-9767.18538	0	0	0	0	NA	NA
Cluster-1547.0	0	0	0	0	NA	NA
Cluster-9767.9828	2	14	0.36	2.36	2.7485	1
Cluster-9767.9829	7	2	7.85	2.05	-1.8662	1
Cluster-9767.1857	0	0	0	0	NA	NA
Cluster-1211.0	1	3	0.85	2.36	1.5261	1
Cluster-9767.15497	20	21	3.46	3.36	0.011496	1
Cluster-1953.0	0	0	0	0	NA	NA
Cluster-9767.20634	31.6	22.65	3.14	2.08	-0.53533	1
Cluster-309.0	0	14.91	0	0.52	Inf	0.59874
Cluster-1217.0	2	9	1.1	4.59	2.111	1
Cluster-148.0	0	10	0	1.88	Inf	1
Cluster-9767.15496	0	0	0	0	NA	NA
Cluster-9767.13060	114	110	29.47	26.31	-0.11042	1
Cluster-3553.0	9	1.84	2.26	0.43	-2.2288	1
Cluster-9767.13061	2	2	4.98	4.37	-0.058894	1
Cluster-9767.979	0	0	0	0	NA	NA
Cluster-9767.13062	0	0	0	0	NA	NA
Cluster-9767.36920	3	4	5.49	6.55	0.35614	1
Cluster-9901.1	11	14	1.21	1.42	0.28903	1
Cluster-9767.36922	10	9.52	1.08	0.95	-0.058894	1
Cluster-9767.36923	3	5	0.54	0.83	0.67807	1
Cluster-9767.36924	0	0	0	0	NA	NA
Cluster-3844.0	1	1	3.29	2.83	-0.058894	1
Cluster-3029.0	0	5	0	23	Inf	1
Cluster-9767.36927	1	0	6.65	0	#NAME?	1
Cluster-9767.36928	20.05	21.52	1.08	1.07	0.07861	1
Cluster-9767.36929	124	97.77	3.17	2.31	-0.39838	1
Cluster-1557.0	7	13	0.65	1.12	0.83419	1
Cluster-9767.9825	35	32	5.03	4.25	-0.18818	1
Cluster-4251.0	3	2	2.53	1.56	-0.64386	1
Cluster-9767.9826	60	35	46.64	25.1	-0.8365	1
Cluster-9767.9827	6	16	0.74	1.82	1.3561	1
Cluster-9767.1850	3	0	1.71	0	#NAME?	1
Cluster-9472.1	6	1	7.27	1.11	-2.6439	1
Cluster-5111.0	1.37	2.44	0.28	0.47	0.94111	1
Cluster-9767.15494	0	0	0	0	NA	NA
Cluster-9767.27575	1	0	4.79	0	#NAME?	1
Cluster-9767.20706	594	481	32.02	23.95	-0.36332	1
Cluster-9767.27577	169	105	6.46	3.71	-0.74553	1
Cluster-9767.27576	36.32	25.65	8.85	5.78	-0.52838	1
Cluster-9767.20703	1042	1068	36.3	34.36	-0.023337	1
Cluster-9767.27570	206.75	170.83	15.96	12.19	-0.33453	1
Cluster-9767.20701	802	674	107.69	83.65	-0.30975	1
Cluster-9767.20700	543	641	16.52	18.01	0.18048	1
Cluster-9767.27579	285	278	12.49	11.25	-0.094771	1
Cluster-9767.27578	969	978	79.26	73.91	-0.045556	1
Cluster-9767.20709	150	154	23.88	22.67	-0.020926	1
Cluster-9767.20708	4	5	12.8	13.79	0.26303	1
Cluster-9767.7186	36.79	20.99	1.77	0.93	-0.87603	1
Cluster-288.0	4	7	2.97	4.8	0.74846	1
Cluster-9767.20630	291	337	58.72	62.88	0.15284	1
Cluster-4766.0	0	0	0	0	NA	NA
Cluster-9767.7183	5	9	1.35	2.25	0.7891	1
Cluster-6948.0	14.46	9	1.31	0.75	-0.69632	1
Cluster-9767.4569	1	2	1.17	2.14	0.94111	1
Cluster-9767.5084	6	1	2.71	0.42	-2.6439	1
Cluster-9767.5482	0	0	0	0	NA	NA
Cluster-9767.5483	9	11	21.87	23.52	0.23061	1
Cluster-9767.5480	11	9	2.04	1.55	-0.3484	1
Cluster-9767.26629	103.78	107.29	2.83	2.7	-0.017866	1
Cluster-9767.5486	1	3	4.5	11.3	1.5261	1
Cluster-9767.5487	0	0	0	0	NA	NA
Cluster-9767.5484	1	0	2.43	0	#NAME?	1
Cluster-9767.5485	2	0	2.18	0	#NAME?	1
Cluster-9767.26622	0	0	0	0	NA	NA
Cluster-9767.26623	2814.17	2890.6	141.27	134.03	-0.019947	1
Cluster-9767.26620	9.12	4.29	1.16	0.5	-1.2288	1
Cluster-9767.26621	903	962	49.61	48.82	0.032417	1
Cluster-9767.26626	88.12	146.69	2.83	4.35	0.68135	1
Cluster-9767.26627	0	11	0	8.45	Inf	1
Cluster-9767.26624	2155	1786	176.73	135.32	-0.32985	1
Cluster-9767.26625	11.47	14.07	0.27	0.31	0.28903	1
Cluster-732.2	18	10.59	2.64	1.44	-0.76939	1
Cluster-9767.7188	8	13	3.22	4.85	0.64155	1
Cluster-9767.33152	71.68	46.11	2.86	1.7	-0.70526	1
Cluster-9767.33153	3	5	8.88	12.83	0.67807	1
Cluster-6072.0	14	22	2.02	2.94	0.59318	1
Cluster-9767.28289	560	513	41.77	35.35	-0.18536	1
Cluster-9767.33156	29	19	10.54	6.39	-0.66895	1
Cluster-9767.33157	1	2	0.28	0.53	0.94111	1
Cluster-9767.34502	28	35	4.47	5.16	0.26303	1
Cluster-9767.33155	63.21	43.6	7.45	4.75	-0.57674	1
Cluster-9767.28282	173.81	126.44	4.8	3.22	-0.52456	1
Cluster-9767.28283	26	33	20.68	24.21	0.28506	1
Cluster-9767.28280	879.08	1112.16	32.58	38.06	0.28033	1
Cluster-9767.33159	125.55	142.04	2.29	2.39	0.11357	1
Cluster-9767.28286	159	167	7.33	7.11	0.011928	1
Cluster-9767.28287	14.72	40.28	2.32	5.87	1.3561	1
Cluster-9767.28284	162	151	16.38	14.11	-0.16034	1
Cluster-9767.28285	545.89	453.31	7.02	5.38	-0.32828	1
Cluster-9767.5738	0	1	0	16.16	Inf	1
Cluster-9767.5739	6.17	6.49	1.53	1.49	-0.058894	1
Cluster-1020.0	3	5	1.45	2.24	0.67807	1
Cluster-9767.5730	238	221	10.77	9.24	-0.16581	1
Cluster-9767.5731	4	5	3.11	3.59	0.26303	1
Cluster-9767.5732	12	0	1.63	0	#NAME?	0.80656
Cluster-4750.0	5	0	9.15	0	#NAME?	1
Cluster-9767.5734	3.85	6.67	0.4	0.64	0.74846	1
Cluster-9767.5735	63	47	20.04	13.84	-0.48158	1
Cluster-9767.5736	3	4	2.77	3.39	0.35614	1
Cluster-9767.5737	1	3	0.29	0.8	1.5261	1
Cluster-9767.5803	7	2	3.37	0.89	-1.8662	1
Cluster-9767.37122	2	4	2.54	4.63	0.94111	1
Cluster-7444.2	1	0	16.54	0	#NAME?	1
Cluster-9767.27391	19	19	17.07	15.71	-0.058894	1
Cluster-9767.27390	370.65	272.65	9.83	6.68	-0.50141	1
Cluster-9767.27393	30	37	299.73	284.76	0.24367	1
Cluster-9767.27392	173.84	229.34	17.35	21.15	0.33737	1
Cluster-9767.27395	0	0	0	0	NA	NA
Cluster-7444.0	0	0	0	0	NA	NA
Cluster-9767.4289	0	2	0	16.52	Inf	1
Cluster-9767.4288	10	17	1.19	1.87	0.70664	1
Cluster-9767.4287	0	2	0	3.77	Inf	1
Cluster-9767.27398	747.22	892.43	16.33	18.01	0.19704	1
Cluster-9767.4285	11	3	1.28	0.32	-1.9334	1
Cluster-7444.1	0	0	0	0	NA	NA
Cluster-9767.4283	2	1	1.26	0.58	-1.0589	1
Cluster-9767.4282	23	23	3.03	2.8	-0.058894	1
Cluster-9767.4281	0	0	0	0	NA	NA
Cluster-9767.4280	125.32	135.94	20.9	20.96	0.062785	1
Cluster-5179.0	14	7	5.37	2.48	-1.0589	1
Cluster-5203.0	3	3	2.36	2.18	-0.058894	1
Cluster-6871.1	4	11	0.72	1.83	1.4005	1
Cluster-6871.0	11	13	1.22	1.34	0.18211	1
Cluster-887.0	30.44	7.44	1.25	0.28	-2.1584	1
Cluster-9767.3888	0	0	0	0	NA	NA
Cluster-9767.3889	1	0	9.25	0	#NAME?	1
Cluster-9767.37128	82.5	45.98	6.61	3.4	-0.89288	1
Cluster-9767.3880	6	3	13.3	5.89	-1.0589	1
Cluster-9767.3881	69	71	7.05	6.71	-0.017671	1
Cluster-9767.3882	0	2	0	12.98	Inf	1
Cluster-9767.3883	4	11	5.34	13.36	1.4005	1
Cluster-9767.3884	0	0	0	0	NA	NA
Cluster-9767.3885	5.28	12.84	0.78	1.76	1.3196	1
Cluster-9767.3886	125	143	7.5	7.93	0.13519	1
Cluster-9767.3887	3	1	1.39	0.43	-1.6439	1
Cluster-9767.7398	0	2	0	0.27	Inf	1
Cluster-9767.7399	5	10	11.34	20.05	0.94111	1
Cluster-6865.0	14.61	25	1.37	2.16	0.67807	1
Cluster-9767.7390	0	1	0	23.43	Inf	1
Cluster-9767.7391	250	245	22.04	19.96	-0.08804	1
Cluster-9767.7392	0	0	0	0	NA	NA
Cluster-9767.7393	0	0	0	0	NA	NA
Cluster-9767.7394	4	4	12.47	10.77	-0.058894	1
Cluster-9767.7395	81	101	13.8	15.91	0.25947	1
Cluster-6739.0	3	4	1.21	1.49	0.35614	1
Cluster-9767.7397	0	0	0	0	NA	NA
Cluster-4189.1	0	0	0	0	NA	NA
Cluster-812.0	6	9	1.02	1.42	0.52607	1
Cluster-9767.16218	97.69	75.19	2.92	2.08	-0.44478	1
Cluster-9767.16219	1066.63	815.86	293.69	207.84	-0.44581	1
Cluster-4189.0	13	10	1.59	1.13	-0.43741	1
Cluster-9767.21394	0	3	0	1.46	Inf	1
Cluster-8679.0	6.63	5.86	0.48	0.39	-0.28129	1
Cluster-9767.16210	194	174	14.78	12.25	-0.21586	1
Cluster-9767.16211	9	22	2.52	5.7	1.2306	1
Cluster-9767.16212	3.89	7.03	2.45	4.1	0.74846	1
Cluster-9767.16213	26	23	23.36	19.01	-0.23577	1
Cluster-9767.16214	230.13	330.7	5.7	7.56	0.4663	1
Cluster-9767.16215	20	10	2.34	1.08	-1.0589	1
Cluster-9767.16216	1	0	4.5	0	#NAME?	1
Cluster-9767.16217	13.93	16.89	2.07	2.32	0.22121	1
Cluster-9750.0	0	1.71	0	0.19	Inf	1
Cluster-3836.0	0	0	0	0	NA	NA
Cluster-9767.28688	459.04	636.92	27.96	35.83	0.41391	1
Cluster-9767.3778	10	11.9	0.92	1.01	0.20414	1
Cluster-9767.3779	96	99	83.06	78.87	-0.0145	1
Cluster-9767.3776	51	79	53.16	75.49	0.57246	1
Cluster-9767.3777	3	5	76.11	88.3	0.67807	1
Cluster-9767.3774	0	1	0	1.12	Inf	1
Cluster-9767.27464	847.65	843.22	53.53	49.19	-0.067425	1
Cluster-9767.3772	49.17	39.75	4.77	3.57	-0.35168	1
Cluster-1093.0	4	3	0.75	0.52	-0.47393	1
Cluster-9767.3770	6	13.66	0.52	1.09	1.1635	1
Cluster-9767.3771	27.81	27.97	1.59	1.48	-0.058894	1
Cluster-9767.7648	2.02	2.96	0.33	0.45	0.52607	1
Cluster-9767.28687	66.86	16.19	4.31	0.96	-2.125	0.75208
Cluster-9767.7646	64	131	24.68	46.76	0.97453	1
Cluster-9767.7647	0	2	0	8.43	Inf	1
Cluster-9767.7644	0	1	0	4.34	Inf	1
Cluster-9767.7645	20	35	9.15	14.82	0.74846	1
Cluster-9767.7642	0	1	0	4.88	Inf	1
Cluster-9767.7643	6	5	1.32	1.02	-0.32193	1
Cluster-9767.7640	2.66	6.46	0.39	0.88	0.94111	1
Cluster-7290.0	1	4	0.51	1.9	1.9411	1
Cluster-9767.34272	250	234	19.52	16.88	-0.15431	1
Cluster-9767.34273	49.85	51.73	3.84	3.69	-0.0023102	1
Cluster-9767.34270	0	1	0	1.3	Inf	1
Cluster-9767.34271	15.12	0	1.11	0	#NAME?	0.52121
Cluster-9767.34276	219.19	210.7	26.56	23.6	-0.11258	1
Cluster-9767.34277	0	0	0	0	NA	NA
Cluster-9767.34274	82.43	77.42	4.42	3.83	-0.14966	1
Cluster-9767.34275	0	0	0	0	NA	NA
Cluster-9767.34278	350	400	18.32	19.34	0.13375	1
Cluster-9767.34279	114	127	5.81	5.98	0.096901	1
Cluster-4319.0	2	2	0.54	0.5	-0.058894	1
Cluster-9767.28681	234.03	94.66	2.32	0.87	-1.3594	0.70158
Cluster-9767.17532	1	6	1.83	9.83	2.5261	1
Cluster-4627.0	0	0	0	0	NA	NA
Cluster-9767.13927	0	0	0	0	NA	NA
Cluster-4877.1	0	0	0	0	NA	NA
Cluster-9767.40959	4.69	0	0.34	0	#NAME?	1
Cluster-9726.1	6.87	5.22	0.61	0.42	-0.54432	1
Cluster-9726.0	8.13	12.78	0.54	0.79	0.64155	1
Cluster-9767.40954	12	6	1.24	0.58	-1.0589	1
Cluster-9767.40955	0	5	0	3.71	Inf	1
Cluster-9767.40956	29.06	15.37	1.12	0.55	-1.01	1
Cluster-9767.40957	5	5	1.93	1.78	-0.058894	1
Cluster-9767.40950	0	0	0	0	NA	NA
Cluster-9767.40951	9	9	3.16	2.93	-0.058894	1
Cluster-9767.40952	1	0	2.37	0	#NAME?	1
Cluster-9767.40953	3	0	0.58	0	#NAME?	1
Cluster-9767.28912	269.5	252.41	6.35	5.49	-0.15308	1
Cluster-9767.28913	159.82	153.68	21.69	19.28	-0.11404	1
Cluster-9767.28910	248	259	12.94	12.48	0.0037183	1
Cluster-9767.28911	4	3	2.52	1.75	-0.47393	1
Cluster-9767.28916	78	96	31.21	35.56	0.24067	1
Cluster-9767.28917	544	345	34.42	20.16	-0.7159	1
Cluster-9767.28914	334.02	299.06	8.21	6.79	-0.2186	1
Cluster-9767.28915	14	12	2.32	1.84	-0.28129	1
Cluster-9767.17161	125	188	11.42	15.87	0.52991	1
Cluster-9767.17160	222	312	27.06	35.14	0.43209	1
Cluster-9767.17163	104	135	28.27	33.95	0.31748	1
Cluster-9767.17162	80.64	32.32	3.75	1.39	-1.3987	1
Cluster-9767.17165	128	68	35.24	17.32	-0.97143	1
Cluster-9767.17164	561.39	569.43	38.6	36.17	-0.038466	1
Cluster-787.0	0	2	0	2.88	Inf	1
Cluster-9767.17166	36	31	22.71	18.08	-0.27462	1
Cluster-6327.0	10	80	0.39	2.92	2.9411	0.13831
Cluster-5442.0	1.36	1.32	0.25	0.22	-0.058894	1
Cluster-1422.0	3.76	2.76	0.81	0.55	-0.47393	1
Cluster-7504.0	3.87	12.77	0.53	1.61	1.6415	1
Cluster-9767.9590	9	4	3.47	1.43	-1.2288	1
Cluster-9767.9591	1	1	0.79	0.73	-0.058894	1
Cluster-9767.9592	86	91	3.71	3.62	0.022636	1
Cluster-9767.9593	0	0	0	0	NA	NA
Cluster-9767.9594	14	4	9.66	2.55	-1.8662	1
Cluster-9767.9595	10	7	47.88	27.88	-0.57347	1
Cluster-9767.9596	12	26	6.79	13.6	1.0566	1
Cluster-9767.9597	49.91	45.28	3.32	2.79	-0.2109	1
Cluster-9767.9598	222.09	282.72	11.06	13.01	0.29135	1
Cluster-9767.9599	21	12	7.86	4.16	-0.86625	1
Cluster-8882.0	0	0	0	0	NA	NA
Cluster-9767.6111	0	2	0	2.73	Inf	1
Cluster-9767.6110	41	65	1.19	1.74	0.60592	1
Cluster-9767.6113	30	87	12.98	34.84	1.4772	1
Cluster-9767.6112	13	14	2.5	2.49	0.048022	1
Cluster-9767.6115	122.99	133.41	8.65	8.67	0.053874	1
Cluster-9767.6114	8	11	2.51	3.19	0.40054	1
Cluster-9767.6117	0	0	0	0	NA	NA
Cluster-9767.6116	206	243	8.29	9.04	0.17942	1
Cluster-9767.6119	76	118	3.61	5.18	0.57582	1
Cluster-9767.6118	0	0	0	0	NA	NA
Cluster-6950.1	14	26	1.2	2.06	0.83419	1
Cluster-6950.0	3	4	2.03	2.5	0.35614	1
Cluster-9767.4699	0	0	0	0	NA	NA
Cluster-9767.39928	4.76	2	3.66	1.42	-1.3808	1
Cluster-8584.0	2	0	2.03	0	#NAME?	1
Cluster-4895.0	4	3	1.08	0.75	-0.47393	1
Cluster-9767.8643	37.31	10	2.42	0.6	-1.9464	1
Cluster-9767.8642	0	0	0	0	NA	NA
Cluster-9767.8641	3	6	8.65	15.04	0.94111	1
Cluster-9767.8640	1	0	2.07	0	#NAME?	1
Cluster-1004.0	0	6	0	3.06	Inf	1
Cluster-9767.8646	0	0	0	0	NA	NA
Cluster-9767.8645	20	19	9.35	8.22	-0.13289	1
Cluster-9767.8644	90	103	11.55	12.21	0.13575	1
Cluster-9767.8649	202	165	20.79	15.69	-0.35078	1
Cluster-9767.8648	795	686	87.64	69.88	-0.27164	1
Cluster-4827.0	3	1	1.29	0.4	-1.6439	1
Cluster-5657.0	3	2	1.5	0.93	-0.64386	1
Cluster-1739.0	0	0	0	0	NA	NA
Cluster-9767.34669	11	16	2.41	3.24	0.48167	1
Cluster-9767.24848	162.88	61.08	19.74	6.84	-1.4769	0.80656
Cluster-4881.0	10	12.77	1.06	1.25	0.31962	1
Cluster-9767.10029	1	1.62	1.16	1.71	0.94111	1
Cluster-9767.28468	92.76	96.77	4.34	4.18	0.0018603	1
Cluster-9767.29987	595.51	337.41	24.71	12.93	-0.88146	1
Cluster-9767.30367	0	0	0	0	NA	NA
Cluster-543.0	13.6	0	2.98	0	#NAME?	0.59874
Cluster-9767.22521	3361	3642	80.18	80.24	0.056947	1
Cluster-9767.15113	487	317	130.14	78.37	-0.67833	1
Cluster-9767.30368	22.63	81.37	1.22	4.04	1.7574	1
Cluster-9767.31147	79.65	84.93	1.83	1.8	0.028569	1
Cluster-9767.2919	82.13	109.83	4.43	5.47	0.36491	1
Cluster-9767.2918	0	0	0	0	NA	NA
Cluster-2049.2	2	4	0.85	1.57	0.94111	1
Cluster-1885.0	0	0	0	0	NA	NA
Cluster-9767.2915	8.58	0	1.42	0	#NAME?	1
Cluster-5399.0	10	5	1.22	0.56	-1.0589	1
Cluster-9767.2917	9	1	3.29	0.34	-3.2288	1
Cluster-9767.2916	61	36	10.59	5.78	-0.81971	1
Cluster-9767.2911	14	16	3.4	3.59	0.13375	1
Cluster-9767.2910	5	2	13.71	4.78	-1.3808	1
Cluster-9767.2913	0	1	0	1.04	Inf	1
Cluster-9767.2912	2.63	25.18	0.23	2.02	3	1
Cluster-9767.13047	6	7	19.2	19.31	0.1635	1
Cluster-9597.0	3	2	1.76	1.08	-0.64386	1
Cluster-1072.0	9.24	4.57	2.49	1.14	-0.90689	1
Cluster-9767.22520	72.72	65.44	7.07	5.88	-0.22635	1
Cluster-9767.15110	419	324	46.11	32.95	-0.42985	1
Cluster-6745.0	4	5	1.38	1.59	0.26303	1
Cluster-9505.0	0	0	0	0	NA	NA
Cluster-9767.40076	0	9.79	0	1.92	Inf	1
Cluster-7987.0	6.43	0	0.53	0	#NAME?	1
Cluster-4782.0	16.94	31.64	0.66	1.14	0.85364	1
Cluster-9767.3216	15.13	30.89	0.56	1.05	0.98841	1
Cluster-9767.10300	40.91	48.86	2.79	3.08	0.19826	1
Cluster-9767.10301	22	30	4.87	6.15	0.38857	1
Cluster-9767.10302	78.95	48.68	2.09	1.19	-0.74796	1
Cluster-9767.10303	0	1	0	5.03	Inf	1
Cluster-9767.10304	2	0	3.59	0	#NAME?	1
Cluster-9767.10305	27.47	45.89	1.05	1.61	0.70978	1
Cluster-9767.10306	14	8	0.95	0.5	-0.86625	1
Cluster-9767.10307	2	3	5.22	6.86	0.52607	1
Cluster-9767.10308	0	0	0	0	NA	NA
Cluster-9767.10309	0	0	0	0	NA	NA
Cluster-2865.0	4	1	2.06	0.48	-2.0589	1
Cluster-6133.0	23	36	8.13	11.78	0.58747	1
Cluster-9875.0	3	5	2.39	3.67	0.67807	1
Cluster-9767.4696	13	22	16	24.69	0.7001	1
Cluster-9767.8199	0	0	0	0	NA	NA
Cluster-2055.1	7	7	1.27	1.18	-0.058894	1
Cluster-2055.0	0	1	0	1.84	Inf	1
Cluster-9767.13806	25	43	4.81	7.66	0.72351	1
Cluster-9767.4697	24.26	25.89	4.2	4.14	0.056584	1
Cluster-9564.2	0	3.95	0	0.63	Inf	1
Cluster-2136.0	2	8	0.66	2.43	1.9411	1
Cluster-9767.4829	1	1	0.61	0.57	-0.058894	1
Cluster-9767.13042	108.03	239.31	3.19	6.53	1.0871	1
Cluster-9767.27795	1413	1482	133.88	129.75	0.0098903	1
Cluster-9767.17360	27	38	3.79	4.92	0.43415	1
Cluster-7155.0	0	0	0	0	NA	NA
Cluster-3475.0	0	0	0	0	NA	NA
Cluster-9767.22525	848	652	40.45	28.73	-0.43809	1
Cluster-9767.17367	13	16	0.88	1	0.24067	1
Cluster-9767.27263	20	22	4.59	4.67	0.07861	1
Cluster-9767.6589	0	0	0	0	NA	NA
Cluster-9767.27797	285.35	275.19	15.93	14.19	-0.11042	1
Cluster-9767.27796	575.23	1040.62	16.12	26.94	0.79744	1
Cluster-9767.27791	3	4	0.56	0.69	0.35614	1
Cluster-4016.0	2	6	0.41	1.14	1.5261	1
Cluster-9767.27790	62	35	91.92	46.96	-0.88381	1
Cluster-9767.24159	4605	4971	306.02	305.16	0.051441	1
Cluster-9767.20161	36.25	69.77	11.77	20.96	0.90046	1
Cluster-9767.20160	57	90	20.26	29.61	0.60007	1
Cluster-9767.32299	6	9	6.34	8.72	0.52607	1
Cluster-9564.0	270.95	214.33	21.02	15.36	-0.39958	1
Cluster-9767.32979	91.6	130.99	0.98	1.3	0.45097	1
Cluster-9767.1425	65.56	82.3	10.31	11.96	0.25426	1
Cluster-9767.6581	1	1	0.84	0.78	-0.058894	1
Cluster-5543.2	10	18	1.6	2.66	0.7891	1
Cluster-5543.0	2	0	5.1	0	#NAME?	1
Cluster-5543.1	4.75	17.32	0.55	1.86	1.7066	1
Cluster-5387.0	0	2	0	1.63	Inf	1
Cluster-8100.0	3	5	0.79	1.21	0.67807	1
Cluster-9767.40138	6.92	11.64	0.98	1.53	0.71871	1
Cluster-9767.40139	26	15.37	1.56	0.85	-0.85244	1
Cluster-9767.40136	55.87	73.95	1.53	1.87	0.3432	1
Cluster-9767.40137	1	5	0.36	1.66	2.263	1
Cluster-9767.40134	7	5	4.73	3.12	-0.54432	1
Cluster-9767.40135	2	13	0.53	3.21	2.6415	1
Cluster-9767.40132	0	1.54	0	0.17	Inf	1
Cluster-9767.40133	3.43	9.46	1.07	2.73	1.5261	1
Cluster-9767.40130	0	0	0	0	NA	NA
Cluster-9767.40131	34	51	3.43	4.76	0.52607	1
Cluster-9585.0	3	11	0.53	1.79	1.8156	1
Cluster-9767.13041	4	6	2.76	3.82	0.52607	1
Cluster-8110.0	8	15.84	0.36	0.66	0.94111	1
Cluster-9767.20168	159.86	131.98	14.46	11.03	-0.33643	1
Cluster-3461.0	0	0	0	0	NA	NA
Cluster-1874.0	0	3	0	17.11	Inf	1
Cluster-9767.31140	2	4	3.66	6.55	0.94111	1
Cluster-4510.0	0	0	0	0	NA	NA
Cluster-9767.22529	18560	20742	1485.57	1533.85	0.10146	1
Cluster-3155.0	3	7	0.71	1.54	1.1635	1
Cluster-9767.28357	17	12	3.54	2.31	-0.56139	1
Cluster-8277.0	0	1.37	0	0.69	Inf	1
Cluster-9767.1806	0	0	0	0	NA	NA
Cluster-9767.25424	313	291	55.56	47.75	-0.16404	1
Cluster-2047.0	2	4	1.19	2.21	0.94111	1
Cluster-9767.25426	63	105	4.38	6.74	0.67807	1
Cluster-9767.25421	236.34	403.67	5.99	9.45	0.71667	1
Cluster-9767.25420	0	0	0	0	NA	NA
Cluster-9767.25423	2	2	6.23	5.38	-0.058894	1
Cluster-5397.0	2	0	0.34	0	#NAME?	1
Cluster-9767.25429	82	90	5.34	5.41	0.075407	1
Cluster-9767.25428	111.53	108.26	2.41	2.16	-0.11136	1
Cluster-9767.14533	0	0	0	0	NA	NA
Cluster-9767.14532	2	1	2.38	1.09	-1.0589	1
Cluster-9767.14531	119.99	122.08	29.92	28.16	-0.035047	1
Cluster-9767.14530	122	104	15.46	12.18	-0.28919	1
Cluster-9767.14537	31	23	4.36	2.99	-0.48953	1
Cluster-9767.33825	139.1	135	19.38	17.38	-0.10102	1
Cluster-9767.14535	4	1	0.66	0.15	-2.0589	1
Cluster-9767.14534	31.25	21.52	4.43	2.82	-0.55366	1
Cluster-3149.0	28.95	17.58	1.57	0.88	-0.74695	1
Cluster-9767.14538	127.68	172.7	3.91	4.89	0.37573	1
Cluster-6211.1	0	0	0	0	NA	NA
Cluster-6211.0	0	0	0	0	NA	NA
Cluster-442.0	3	3	1.64	1.52	-0.058894	1
Cluster-1517.0	6	5	1.11	0.85	-0.32193	1
Cluster-2742.0	0	0	0	0	NA	NA
Cluster-2742.1	20	27	1.81	2.26	0.37407	1
Cluster-3221.1	4	2	0.9	0.42	-1.0589	1
Cluster-9767.4364	36	47	6.43	7.76	0.32577	1
Cluster-3221.0	6	0	1.85	0	#NAME?	1
Cluster-2441.0	1	1	0.72	0.66	-0.058894	1
Cluster-9767.34481	55	50	4	3.36	-0.1964	1
Cluster-9767.12274	0	0	0	0	NA	NA
Cluster-9767.12275	62.35	69.19	4.8	4.92	0.095434	1
Cluster-9767.12272	63	52	18.82	14.37	-0.33573	1
Cluster-5834.0	0	0	0	0	NA	NA
Cluster-9767.25399	0	0	0	0	NA	NA
Cluster-9767.12271	214.68	257.21	20.71	22.93	0.19854	1
Cluster-9767.25397	335	448	23.26	28.74	0.36044	1
Cluster-9767.25396	1693	1516	24.38	20.16	-0.21821	1
Cluster-9767.25395	196.37	429.08	4.68	9.44	1.0712	0.88971
Cluster-9767.25394	2	2	2.58	2.35	-0.058894	1
Cluster-9767.25393	687	646	31.66	27.49	-0.14767	1
Cluster-9767.25392	236.13	116.9	5.36	2.45	-1.0712	1
Cluster-9767.25391	371	289	26.73	19.23	-0.41924	1
Cluster-9767.25390	4596.57	4253.09	376.96	322.24	-0.17111	1
Cluster-9767.26947	218.86	283.35	6.87	8.22	0.31098	1
Cluster-3761.0	3	5	0.57	0.88	0.67807	1
Cluster-9767.42315	6	2	1.54	0.48	-1.6439	1
Cluster-9767.42316	0	5	0	4.41	Inf	1
Cluster-9767.13574	37	38	7.54	7.16	-0.02042	1
Cluster-9767.16975	162	183	13.32	13.9	0.11696	1
Cluster-9767.16974	7.41	10.07	0.56	0.7	0.45568	1
Cluster-9767.16977	34	50	2.11	2.86	0.4975	1
Cluster-9767.16976	199	251	18.42	21.46	0.27603	1
Cluster-9767.16971	47.27	38.3	5.21	3.9	-0.36556	1
Cluster-9767.16970	123.51	133.46	5.27	5.26	0.042192	1
Cluster-9767.16973	0	2	0	1.94	Inf	1
Cluster-9767.16972	10	11	2.27	2.31	0.07861	1
Cluster-9767.6090	1	0	2.88	0	#NAME?	1
Cluster-9767.16979	115.42	198.52	1.73	2.75	0.73224	1
Cluster-9767.16978	6	6	5.68	5.22	-0.058894	1
Cluster-9767.26942	25.58	35.64	16.29	20.98	0.41059	1
Cluster-8168.0	67	91	20.69	26.01	0.38281	1
Cluster-9767.6092	296.2	387.82	10.47	12.66	0.33157	1
Cluster-9767.6093	0	3	0	0.43	Inf	1
Cluster-4568.0	7	2	3.07	0.81	-1.8662	1
Cluster-3068.0	0	0	0	0	NA	NA
Cluster-2774.0	0	7	0	4.12	Inf	1
Cluster-3367.0	11.19	0	0.79	0	#NAME?	0.93048
Cluster-2455.0	0	0	0	0	NA	NA
Cluster-9767.42318	3	1	2.66	0.82	-1.6439	1
Cluster-9767.21614	1711	1352	162.85	118.9	-0.39864	1
Cluster-9767.6099	41.05	52.29	1.91	2.25	0.28399	1
Cluster-9767.34980	335	255	8.76	6.16	-0.45256	1
Cluster-1153.0	0	4	0	5.19	Inf	1
Cluster-6511.0	9	3	1.35	0.42	-1.6439	1
Cluster-9767.5627	12	6	1.1	0.51	-1.0589	1
Cluster-9767.12857	9	5	6.41	3.29	-0.90689	1
Cluster-9445.0	0	0	0	0	NA	NA
Cluster-9767.34981	12.51	18.09	1.13	1.51	0.41059	1
Cluster-3096.0	5	3	0.84	0.46	-0.79586	1
Cluster-9090.1	9	17	2.56	4.47	0.85864	1
Cluster-9090.0	3	12	0.82	3.04	1.9411	1
Cluster-4819.0	24	16	6.72	4.15	-0.64386	1
Cluster-3377.0	0	5	0	1.28	Inf	1
Cluster-9767.31066	67.21	24.13	2.34	0.78	-1.54	1
Cluster-9767.39537	1	2	3.04	5.26	0.94111	1
Cluster-8311.1	2	2	7.14	6.09	-0.058894	1
Cluster-7737.0	2	0	3.02	0	#NAME?	1
Cluster-6033.0	0	4.21	0	0.58	Inf	1
Cluster-9767.8672	143	165	9.14	9.74	0.14756	1
Cluster-6409.0	4	0	2.15	0	#NAME?	1
Cluster-7727.0	4	4	2.94	2.72	-0.058894	1
Cluster-6023.0	9	9	8.87	8.14	-0.058894	1
Cluster-9767.31068	87	87	20.49	18.95	-0.058894	1
Cluster-3175.0	31	27	9.44	7.61	-0.2582	1
Cluster-9767.39947	113.59	140.31	5.22	5.95	0.2375	1
Cluster-3740.1	13	12	5.34	4.56	-0.17437	1
Cluster-9767.21892	573.16	603.72	14.83	14.42	0.01712	1
Cluster-9767.21893	8	15	18.99	31.39	0.848	1
Cluster-9767.39943	533	479	20.18	16.75	-0.213	1
Cluster-9767.21895	1869.64	1363.48	33	22.22	-0.51515	1
Cluster-9767.21896	2196	2711.21	37.74	43.02	0.24505	1
Cluster-9767.39940	150.34	168.53	4.13	4.27	0.11317	1
Cluster-9767.21898	106	143	8.16	10.18	0.37306	1
Cluster-9767.21899	10971	13518	331.41	377.13	0.24229	1
Cluster-9767.39949	4	0	0.77	0	#NAME?	1
Cluster-9767.39948	36.43	37.05	1.69	1.59	-0.019365	1
Cluster-9767.37897	39.87	45.21	6.1	6.4	0.11103	1
Cluster-9767.37896	0	2	0	16.52	Inf	1
Cluster-620.0	8	16	0.57	1.06	0.94111	1
Cluster-9767.37894	0	50.79	0	3.07	Inf	0.0048087
Cluster-9767.37893	19	18	24.96	21.51	-0.1369	1
Cluster-9767.37892	14.62	64.49	0.35	1.41	2.0342	0.93048
Cluster-9767.37891	129	185	45.1	59.86	0.46126	1
Cluster-9767.37890	2	3	2.91	3.96	0.52607	1
Cluster-9767.35280	145.55	214.32	2.72	3.7	0.49275	1
Cluster-9767.39532	0	0	0	0	NA	NA
Cluster-9767.37899	236.37	322.75	6.52	8.22	0.39385	1
Cluster-9767.37898	160	105	11.07	6.71	-0.66658	1
Cluster-8075.0	44	44	5.3	4.9	-0.058894	1
Cluster-7499.1	0	0	0	0	NA	NA
Cluster-9767.39479	69.87	87.8	2.1	2.44	0.27125	1
Cluster-1250.0	4	1	1.15	0.27	-2.0589	1
Cluster-5144.1	0	2	0	5.94	Inf	1
Cluster-5144.0	21	29	3.39	4.32	0.40677	1
Cluster-9767.1545	11	16	1.31	1.76	0.48167	1
Cluster-9767.39478	0	0	0	0	NA	NA
Cluster-6477.0	0	5	0	0.89	Inf	1
Cluster-9080.0	0	1	0	1.21	Inf	1
Cluster-3066.0	5	2	1.87	0.69	-1.3808	1
Cluster-9767.38610	0	2.22	0	1.02	Inf	1
Cluster-3369.0	1	0	18.97	0	#NAME?	1
Cluster-9767.20279	181	149	10.7	8.14	-0.33957	1
Cluster-9767.20278	4	1	53.17	9.92	-2.0589	1
Cluster-9767.20277	628.39	730.16	16.07	17.25	0.15824	1
Cluster-9767.20276	1098.04	1380.28	33.81	39.26	0.2709	1
Cluster-9767.20275	0	7	0	2.29	Inf	1
Cluster-9767.20274	1	10	0.22	2.07	3.263	1
Cluster-9767.20273	185	181	210.6	188.4	-0.090429	1
Cluster-9767.20272	0	0	0	0	NA	NA
Cluster-9767.20271	159.21	198.35	17.67	20.35	0.25758	1
Cluster-9767.20270	1117	992.69	54.23	44.51	-0.22866	1
Cluster-6467.0	0	1	0	1.23	Inf	1
Cluster-9767.29002	341.97	438.41	9.37	11.09	0.29804	1
Cluster-2392.0	7.77	6.16	1.11	0.81	-0.47393	1
Cluster-9767.38611	4	9	1.31	2.72	1.111	1
Cluster-4870.0	24	22	3.8	3.22	-0.18442	1
Cluster-8811.0	0	1	0	3.13	Inf	1
Cluster-9767.8530	36	34	38.62	33.41	-0.14136	1
Cluster-2960.0	33.02	24.29	0.6	0.41	-0.51833	1
Cluster-4354.0	21.08	17.39	2.35	1.79	-0.36375	1
Cluster-14.0	0	3	0	4.91	Inf	1
Cluster-2970.0	2	2	1.84	1.7	-0.058894	1
Cluster-9767.23856	143	169	17.84	19.49	0.18211	1
Cluster-5247.1	1.17	0	0.26	0	#NAME?	1
Cluster-9544.0	6	8	1.94	2.39	0.35614	1
Cluster-9767.36416	0	1	0	6.49	Inf	1
Cluster-5247.2	6	8	1.44	1.78	0.35614	1
Cluster-9767.36410	0	1	0	4.6	Inf	1
Cluster-9767.36411	0	0	0	0	NA	NA
Cluster-9767.36412	11	4	9.88	3.31	-1.5183	1
Cluster-9767.36413	0	4.5	0	0.81	Inf	1
Cluster-9767.36418	0	0	0	0	NA	NA
Cluster-9767.36419	0	1	0	9.92	Inf	1
Cluster-9767.31828	1	6	0.69	3.82	2.5261	1
Cluster-9767.31829	147	122	7.13	5.46	-0.32783	1
Cluster-9767.31824	5	3	5.14	2.83	-0.79586	1
Cluster-9767.31825	0	0	0	0	NA	NA
Cluster-7945.0	1	1	0.72	0.66	-0.058894	1
Cluster-9767.31827	0	0	0	0	NA	NA
Cluster-9767.31820	61	63	26.39	25.23	-0.012351	1
Cluster-9767.31821	5.56	10.37	1.29	2.22	0.67807	1
Cluster-9767.31822	1	2	1.46	2.64	0.94111	1
Cluster-9767.31823	160.96	153.3	6.91	6.08	-0.13242	1
Cluster-6199.0	0	16	0	0.71	Inf	0.52121
Cluster-62.0	0	19.97	0	12.6	Inf	0.29148
Cluster-8711.0	7.97	17.57	1.52	3.1	1.111	1
Cluster-9767.37476	206.47	355.47	3.62	5.75	0.72628	1
Cluster-9767.20859	1411.23	1791.75	358.98	421.62	0.28596	1
Cluster-9767.20858	8.38	4	4.29	1.9	-1.0589	1
Cluster-9767.20853	1	3	7.4	17.66	1.5261	1
Cluster-9711.0	0	0	0	0	NA	NA
Cluster-9767.39472	2	9	0.51	2.12	2.111	1
Cluster-9767.20850	30	33	34.68	34.86	0.07861	1
Cluster-9767.20857	1174.67	1342.99	38.77	40.94	0.1339	1
Cluster-9767.20856	1	4	9.61	29.73	1.9411	1
Cluster-9767.20855	4562.51	4325.51	172.5	151.04	-0.13584	1
Cluster-9767.20854	874.48	609.48	23.44	15.08	-0.58008	1
Cluster-9767.33545	164.13	191.9	6.71	7.25	0.16852	1
Cluster-9767.33544	228.03	162.38	9.67	6.36	-0.55193	1
Cluster-9767.33547	26	41	2.72	3.97	0.59822	1
Cluster-9767.33546	11	10	1.76	1.48	-0.1964	1
Cluster-9767.33541	4	1	4.23	0.97	-2.0589	1
Cluster-9767.33540	37.49	37.18	6.34	5.81	-0.058894	1
Cluster-9767.33543	22.91	15.48	12.41	7.77	-0.67557	1
Cluster-9767.33542	13	0	2.19	0	#NAME?	0.70033
Cluster-1775.0	0	0	0	0	NA	NA
Cluster-9767.33549	308	262	19.55	15.36	-0.29226	1
Cluster-9767.33548	75.87	49.1	3.27	1.96	-0.69211	1
Cluster-9767.39141	65.56	0	4.31	0	#NAME?	0.00046868
Cluster-7853.0	0	0	0	0	NA	NA
Cluster-540.0	9	13	1.93	2.57	0.47162	1
Cluster-9767.13914	87	87	21.28	19.68	-0.058894	1
Cluster-7959.0	4	3	2.36	1.64	-0.47393	1
Cluster-9767.13916	0	1	0	0.82	Inf	1
Cluster-9767.13917	51	21	4.36	1.66	-1.339	1
Cluster-9767.39334	149.75	99.92	3.7	2.28	-0.64386	1
Cluster-9767.13911	17	15	1.42	1.15	-0.23947	1
Cluster-9767.13912	3	10	4.79	14.39	1.6781	1
Cluster-9767.13913	7	9	9.67	11.29	0.30368	1
Cluster-9767.13918	179.49	318.84	4.46	7.32	0.7747	1
Cluster-9767.13919	199	114	31.85	16.86	-0.86263	1
Cluster-9767.1784	0	4	0	1.27	Inf	1
Cluster-9767.3570	6	9	7.88	10.75	0.52607	1
Cluster-9767.3571	21.74	15.94	1.53	1.03	-0.51833	1
Cluster-9767.3572	31.49	0	2	0	#NAME?	0.049184
Cluster-9767.3573	27	32	3.08	3.37	0.18622	1
Cluster-9767.3574	53.48	44.23	5.56	4.25	-0.32738	1
Cluster-9767.3575	227	207	7.31	6.16	-0.19196	1
Cluster-9767.3576	93	116	7.11	8.2	0.25993	1
Cluster-9767.3577	0	0	0	0	NA	NA
Cluster-9767.3578	4	9	1.54	3.21	1.111	1
Cluster-9767.3579	10	8	1.48	1.09	-0.38082	1
Cluster-9767.9788	127.79	159.04	10.06	11.57	0.25399	1
Cluster-2908.0	2	4	1.07	1.99	0.94111	1
Cluster-9767.11208	16.18	173.7	0.79	7.84	3.384	0.0017974
Cluster-9767.11209	74.54	93.18	4.54	5.25	0.25145	1
Cluster-9767.11206	3	1	93.59	21.26	-1.6439	1
Cluster-9767.11207	98	83	10.32	8.08	-0.29856	1
Cluster-9767.11204	24	44	3.5	5.94	0.81558	1
Cluster-9767.11205	2.27	4.13	1.01	1.7	0.94111	1
Cluster-9767.11202	82	121	13.29	18.13	0.50242	1
Cluster-9767.11203	4	5	5.17	5.88	0.26303	1
Cluster-9767.11200	0	0	0	0	NA	NA
Cluster-9767.11201	12	22	16.3	27.15	0.81558	1
Cluster-9767.5806	33	29	6.79	5.52	-0.24531	1
Cluster-9767.5807	2	1	4.06	1.81	-1.0589	1
Cluster-9767.5804	0	11.2	0	1.9	Inf	1
Cluster-9767.5805	1	0	5.44	0	#NAME?	1
Cluster-9767.5802	0	0	0	0	NA	NA
Cluster-9767.28025	483.78	721.63	6.29	8.67	0.5181	1
Cluster-9767.5800	0	0	0	0	NA	NA
Cluster-9767.5801	0	5	0	2.53	Inf	1
Cluster-9767.19453	28	22	23.07	16.71	-0.40682	1
Cluster-9767.19452	2452	3138	93.32	110.3	0.29699	1
Cluster-9767.19451	706.81	631.48	36.43	30.07	-0.22296	1
Cluster-9767.19450	76.09	56.45	2.34	1.6	-0.49947	1
Cluster-9767.19457	494.53	470.05	17.04	14.96	-0.13366	1
Cluster-9767.9787	35.1	27.47	4.27	3.09	-0.43329	1
Cluster-9767.5808	96.54	657.83	7.45	46.87	2.7031	1.54E-05
Cluster-9767.5809	100.66	113.95	5.71	5.97	0.11578	1
Cluster-9767.29329	304	366	7.47	8.3	0.20888	1
Cluster-8620.0	21	28	2.06	2.53	0.35614	1
Cluster-9355.0	0	0	0	0	NA	NA
Cluster-1090.0	0	1	0	1.84	Inf	1
Cluster-9767.25982	170.56	243.13	14.89	19.61	0.44807	1
Cluster-9767.25983	519	505	22.68	20.38	-0.098345	1
Cluster-9767.34708	178	261	39.85	54.04	0.49328	1
Cluster-9767.34709	0	0	0	0	NA	NA
Cluster-9767.25986	438.24	492.37	14.58	15.13	0.10883	1
Cluster-9767.25987	1225.2	1221.16	205.39	189.26	-0.063612	1
Cluster-9767.25984	5	6	2.83	3.14	0.20414	1
Cluster-9767.25985	29.58	14.71	4.91	2.26	-1.0589	1
Cluster-9767.34702	0	1.21	0	6.11	Inf	1
Cluster-9767.34703	178.49	214.22	51.14	56.79	0.20684	1
Cluster-9767.34700	175	131	20.5	14.18	-0.47668	1
Cluster-9767.25989	242	202	23.24	17.93	-0.31955	1
Cluster-9767.34706	50.96	75.55	1.6	2.2	0.51661	1
Cluster-9767.34707	107	126	28.59	31.15	0.17692	1
Cluster-9767.34704	4	3	9.28	6.14	-0.47393	1
Cluster-9767.34705	22.24	46.53	0.78	1.52	1.0363	1
Cluster-6299.0	0	0	0	0	NA	NA
Cluster-9767.35758	32	34	11.5	11.31	0.028569	1
Cluster-9767.35259	38	31	3.48	2.62	-0.35262	1
Cluster-9767.35258	346	345	21.05	19.39	-0.063069	1
Cluster-9767.35257	0	1	0	4.6	Inf	1
Cluster-9767.35256	44	46	6.77	6.54	0.0052366	1
Cluster-9767.35255	1	2	0.48	0.88	0.94111	1
Cluster-9767.35254	0	0	0	0	NA	NA
Cluster-9767.35253	13	6	26.4	10.85	-1.1744	1
Cluster-9767.35252	108	128	4.06	4.45	0.18622	1
Cluster-9767.35251	7.73	10.11	0.52	0.63	0.26303	1
Cluster-9767.35250	52	10	3.38	0.6	-2.4374	0.68693
Cluster-9767.30018	199.82	202.94	9.56	8.97	-0.037414	1
Cluster-9767.30019	143	198	21.08	26.97	0.41059	1
Cluster-9767.30012	0	1	0	14.2	Inf	1
Cluster-9767.30013	108.97	155.45	2.55	3.36	0.44905	1
Cluster-9767.30010	3.49	5.64	0.1	0.14	0.94111	1
Cluster-9767.30011	0	0	0	0	NA	NA
Cluster-9767.30016	711	738	23.07	22.12	-0.0051224	1
Cluster-9767.30017	50	57	5.16	5.44	0.13014	1
Cluster-9767.30014	2	1	0.66	0.31	-1.0589	1
Cluster-9767.30015	281.47	138.27	7.74	3.51	-1.0848	1
Cluster-7541.0	0	0	0	0	NA	NA
Cluster-9767.9258	4	9	0.4	0.83	1.111	1
Cluster-9767.8405	0	0	0	0	NA	NA
Cluster-9767.8404	218.69	256.23	27.78	30.08	0.16632	1
Cluster-9767.8407	2	1	1.31	0.61	-1.0589	1
Cluster-9767.8406	3	1	4.97	1.49	-1.6439	1
Cluster-9767.8401	0	4.5	0	1.47	Inf	1
Cluster-9767.8400	2	2	3.73	3.34	-0.058894	1
Cluster-9767.39538	237.72	314.13	8.82	10.76	0.34091	1
Cluster-9767.39539	2.28	1.87	0.27	0.21	-0.058894	1
Cluster-9767.32704	0	3.99	0	0.24	Inf	1
Cluster-7573.0	12	15	2.09	2.41	0.26303	1
Cluster-9767.39534	1	1	2.49	2.19	-0.058894	1
Cluster-9767.32707	2.65	5.94	43.77	71.57	0.94111	1
Cluster-9767.8409	74	92	26.16	30.1	0.25521	1
Cluster-9767.32701	29	29	2.41	2.22	-0.058894	1
Cluster-9767.39530	0	6.81	0	0.72	Inf	1
Cluster-9767.39531	41	38	4.49	3.84	-0.16852	1
Cluster-9767.6050	7	8	3.34	3.54	0.13375	1
Cluster-9767.42351	0	3.34	0	0.37	Inf	1
Cluster-9767.26981	150.66	261.64	8.06	12.93	0.73612	1
Cluster-9767.6053	313.89	245.47	25.51	18.43	-0.41688	1
Cluster-9767.6054	42.99	14.98	10.89	3.51	-1.5783	1
Cluster-9767.26986	1416.29	1614.8	41.81	44.02	0.13082	1
Cluster-9767.26985	426	712	11	16.98	0.68213	1
Cluster-9767.42357	5	1	5.29	0.97	-2.3808	1
Cluster-9767.6058	1	0	1	0	#NAME?	1
Cluster-9767.42359	31.13	57.52	1.44	2.46	0.84489	1
Cluster-9767.26989	33.69	26.64	2.68	1.96	-0.39147	1
Cluster-9767.26988	1389	926	54.33	33.45	-0.64386	1
Cluster-7228.0	2	1	2.38	1.09	-1.0589	1
Cluster-6040.0	4	4	1.03	0.95	-0.058894	1
Cluster-9767.7989	1	3	0.25	0.69	1.5261	1
Cluster-9767.7988	0	0	0	0	NA	NA
Cluster-9767.7985	11	10	10.14	8.48	-0.1964	1
Cluster-9767.7984	27	31	3.38	3.58	0.14042	1
Cluster-9767.7987	0	0	0	0	NA	NA
Cluster-9767.7986	1	0	0.8	0	#NAME?	1
Cluster-9767.7981	9	5	24.08	11.69	-0.90689	1
Cluster-9767.7980	8.67	12.17	1.45	1.88	0.35614	1
Cluster-9767.7983	2.28	5.64	2.19	4.97	1.5261	1
Cluster-9767.7982	14	18	0.74	0.88	0.30368	1
Cluster-2855.0	5	4	1.37	1.01	-0.38082	1
Cluster-9767.8479	26	19	17.22	11.63	-0.51141	1
Cluster-9767.14420	0	0	0	0	NA	NA
Cluster-6601.0	11.89	4.87	1.05	0.4	-1.3219	1
Cluster-3342.0	0	0	0	0	NA	NA
Cluster-1037.0	0	0	0	0	NA	NA
Cluster-9177.0	3	0	1.59	0	#NAME?	1
Cluster-9767.6404	0	0	0	0	NA	NA
Cluster-6633.0	3	2	0.99	0.61	-0.64386	1
Cluster-5833.0	5	1	1.18	0.22	-2.3808	1
Cluster-5833.1	22	16	1.29	0.86	-0.51833	1
Cluster-9767.24163	39	38	17.84	16.09	-0.096368	1
Cluster-9767.24162	3410	3773	130.56	133.42	0.087047	1
Cluster-9767.24161	6078.92	7297.58	93.36	103.49	0.20477	1
Cluster-9767.24160	417.11	491.92	12.72	13.85	0.17972	1
Cluster-9767.24167	1215.52	958.87	38.73	28.22	-0.40143	1
Cluster-695.0	0	1	0	1.58	Inf	1
Cluster-9767.24165	9	7	0.95	0.69	-0.42146	1
Cluster-9767.29189	150.22	179.33	9.43	10.4	0.1961	1
Cluster-9767.31055	735.18	1286.62	9.59	15.5	0.7493	1
Cluster-6790.0	7	4	2.3	1.21	-0.86625	1
Cluster-9767.29184	360	289	15.53	11.51	-0.37582	1
Cluster-9767.31056	0	0	0	0	NA	NA
Cluster-9767.29182	130	102	15.55	11.27	-0.40884	1
Cluster-9767.31050	135.06	125.43	6.53	5.6	-0.16993	1
Cluster-9767.29180	4	4	4.7	4.29	-0.058894	1
Cluster-9767.29181	1683.07	2064.49	62.3	70.58	0.23551	1
Cluster-9767.18472	373	265	19.37	12.71	-0.55208	1
Cluster-9767.18473	0	0	0	0	NA	NA
Cluster-6582.0	0	2	0	8.68	Inf	1
Cluster-9767.18471	18.67	41.82	1.91	3.96	1.0855	1
Cluster-9767.18476	450	464	39.29	37.43	-0.014694	1
Cluster-9767.18477	1	1	11.73	8.88	-0.058894	1
Cluster-9767.18474	56.74	139.7	3.85	8.76	1.2375	1
Cluster-9767.18475	219.63	338.55	8.37	11.92	0.56489	1
Cluster-9767.18478	106.06	76.42	6.88	4.58	-0.53889	1
Cluster-9767.18479	1446.35	1306.29	56.43	47.07	-0.20581	1
Cluster-7369.0	1	5	0.31	1.44	2.263	1
Cluster-7569.0	5	2	3.31	1.22	-1.3808	1
Cluster-9767.9992	83	60.41	4.96	3.34	-0.52704	1
Cluster-5493.0	5	1	1.69	0.31	-2.3808	1
Cluster-196.0	5.73	10.98	0.28	0.49	0.81558	1
Cluster-9767.42300	0	11	0	12.73	Inf	1
Cluster-9767.33184	235	219	18.08	15.57	-0.16062	1
Cluster-9767.24295	141.51	366.14	3.04	7.25	1.3071	0.50676
Cluster-9767.21666	147	242	61.11	93.14	0.6603	1
Cluster-9767.24297	842	906	70.05	69.64	0.046797	1
Cluster-9767.21664	139.59	112.25	22.11	16.44	-0.38082	1
Cluster-9767.21663	0	55.23	0	1.83	Inf	0.0029512
Cluster-9767.24290	2699	2722	62.39	58.11	-0.046652	1
Cluster-9767.21661	5298.26	4523.89	150.99	119.06	-0.28674	1
Cluster-9767.24292	0	0	0	0	NA	NA
Cluster-9767.9998	0	1	0	1.34	Inf	1
Cluster-9767.24299	670	706	63.01	61.35	0.016613	1
Cluster-1854.2	5	5	1.48	1.37	-0.058894	1
Cluster-1854.1	0	12	0	1.73	Inf	0.90948
Cluster-1854.0	6	7	0.76	0.82	0.1635	1
Cluster-9767.29450	6	2	3.15	0.97	-1.6439	1
Cluster-9767.29451	17.13	0	1.3	0	#NAME?	0.38094
Cluster-9767.29452	840	1065	37.99	44.48	0.2835	1
Cluster-9767.29453	763	712	25.34	21.84	-0.1587	1
Cluster-9767.29454	112	115	7.27	6.89	-0.020759	1
Cluster-9767.29455	83	31	32.8	11.34	-1.4797	1
Cluster-9767.29456	31	38	18.66	21.16	0.23484	1
Cluster-9767.29457	645	597	22.37	19.12	-0.17046	1
Cluster-9767.29458	17.26	83.82	1.37	6.14	2.246	0.46873
Cluster-9767.29459	2	1	53.37	18.48	-1.0589	1
Cluster-475.0	2	4	1.49	2.74	0.94111	1
Cluster-9767.27704	249.47	167.04	7.61	4.71	-0.63519	1
Cluster-1154.0	16.33	16.82	1.15	1.1	0.028569	1
Cluster-9767.15707	0	0	0	0	NA	NA
Cluster-9767.1953	41	46	3.83	3.97	0.10712	1
Cluster-9767.12574	178.66	194.87	5.33	5.37	0.064621	1
Cluster-9767.1954	1	3	0.84	2.33	1.5261	1
Cluster-9767.33186	82.65	114.59	29.54	37.91	0.41156	1
Cluster-9767.15705	4	6	1.66	2.31	0.52607	1
Cluster-9767.1955	8.42	14.53	0.39	0.63	0.848	1
Cluster-9767.20134	106	120	7.8	8.16	0.12008	1
Cluster-9767.1915	23.69	40	0.91	1.42	0.67807	1
Cluster-9767.20136	16	26	3.48	5.23	0.64155	1
Cluster-9767.1917	9.31	0	0.76	0	#NAME?	1
Cluster-9767.20130	0	1	0	4.88	Inf	1
Cluster-9767.1911	4.95	8	2.22	3.32	0.61918	1
Cluster-9767.20132	559	564	77.35	72.14	-0.046047	1
Cluster-9767.20133	336.63	328.25	12.41	11.18	-0.097946	1
Cluster-9767.12571	31	40	9.13	10.9	0.30884	1
Cluster-9767.1957	0	1	0	3.29	Inf	1
Cluster-9767.1918	0	1	0	2.76	Inf	1
Cluster-9767.20139	6659	5698	1237.33	978.94	-0.28374	1
Cluster-9767.12570	0	1	0	2.29	Inf	1
Cluster-6138.0	16	14	1.53	1.23	-0.25154	1
Cluster-4931.0	4	5	1.19	1.38	0.26303	1
Cluster-9767.12573	2	4	4.98	8.74	0.94111	1
Cluster-7984.0	0	0	0	0	NA	NA
Cluster-9767.30289	257	241	17.37	15.05	-0.15163	1
Cluster-9093.0	0	0	0	0	NA	NA
Cluster-4903.0	1	4	0.47	1.74	1.9411	1
Cluster-6629.0	4.1	0	0.38	0	#NAME?	1
Cluster-9767.30835	22	41	27.07	46.01	0.83923	1
Cluster-9767.30836	32.89	122.94	1.05	3.64	1.8392	0.57572
Cluster-9767.30837	286	303	22.03	21.56	0.024409	1
Cluster-9767.30830	0	8.06	0	0.55	Inf	1
Cluster-9767.30831	503	603	29.78	32.97	0.20271	1
Cluster-9767.30832	0	0	0	0	NA	NA
Cluster-9767.30833	11	25	30.17	59.81	1.1255	1
Cluster-8043.0	4	4	1.27	1.17	-0.058894	1
Cluster-9767.30838	0	0	0	0	NA	NA
Cluster-9767.30839	4	0	18.01	0	#NAME?	1
Cluster-9767.42221	74	123	1.08	1.66	0.67417	1
Cluster-9767.40446	0	11.61	0	2.94	Inf	0.90948
Cluster-9767.40447	268	786	7.84	21.23	1.4934	0.058981
Cluster-9767.40444	19	17	11.87	9.82	-0.21936	1
Cluster-9767.40445	0	0	0	0	NA	NA
Cluster-9767.40442	2	4	4.43	7.85	0.94111	1
Cluster-9767.40443	9	17	0.75	1.31	0.85864	1
Cluster-9767.40440	3	4	0.44	0.54	0.35614	1
Cluster-1762.0	0	0	0	0	NA	NA
Cluster-581.0	0	1	0	0.85	Inf	1
Cluster-9767.40448	1	2	0.49	0.91	0.94111	1
Cluster-9767.40449	11.84	13.58	1.16	1.23	0.1635	1
Cluster-9767.28321	16.12	14.37	1.4	1.16	-0.25154	1
Cluster-9767.28320	11.88	15.63	1.06	1.28	0.35614	1
Cluster-9767.28323	206	269	22.67	27.35	0.32607	1
Cluster-9767.28322	4.59	7.49	0.91	1.37	0.42653	1
Cluster-9767.28325	55.35	77.3	3.46	4.47	0.42653	1
Cluster-9767.28324	3	0	19.96	0	#NAME?	1
Cluster-9767.28327	9	12	21.87	25.66	0.35614	1
Cluster-9767.28326	1	1	29.6	20.31	-0.058894	1
Cluster-9767.28329	70	92	11.26	13.68	0.33539	1
Cluster-9767.28328	167	163	3.57	3.22	-0.09387	1
Cluster-9767.42222	116.42	245.31	0.9	1.75	1.0198	1
Cluster-9767.24831	31.53	45.41	5.2	6.93	0.43296	1
Cluster-9767.24830	378.02	343.5	34.43	28.91	-0.19907	1
Cluster-9767.24833	1392.19	1303.07	45.5	39.33	-0.15422	1
Cluster-9767.24832	1390.46	1486.76	51.95	51.3	0.038426	1
Cluster-9767.24835	320.88	308.67	6.77	6.01	-0.11386	1
Cluster-9767.24834	124.39	115.28	6.15	5.27	-0.1676	1
Cluster-9767.24837	381.19	491.17	43.45	51.74	0.30704	1
Cluster-9767.24836	744.12	790.33	40.25	39.49	0.027656	1
Cluster-9767.24839	139	203	7.81	10.53	0.4875	1
Cluster-9767.24838	359.04	445.47	25.43	29.15	0.25093	1
Cluster-7100.0	36.3	27.57	1.95	1.37	-0.42146	1
Cluster-9767.26479	529.54	488.55	12.63	10.76	-0.17505	1
Cluster-9767.26478	168.63	120.36	3.24	2.13	-0.55288	1
Cluster-9767.26473	0	0	0	0	NA	NA
Cluster-9767.26472	99.59	75.26	5.92	4.13	-0.47393	1
Cluster-9767.26471	1	3	1.04	2.87	1.5261	1
Cluster-9767.26470	881	1014	169.15	180.02	0.14395	1
Cluster-9767.26477	12	13	2.6	2.61	0.056584	1
Cluster-9767.26476	280.12	220.41	116.46	84.83	-0.40682	1
Cluster-9767.26475	436	565	65.63	78.62	0.31503	1
Cluster-9767.26474	281	285	10.16	9.52	-0.038502	1
Cluster-8508.0	12	10	1.45	1.12	-0.32193	1
Cluster-9767.4368	0	5.14	0	0.76	Inf	1
Cluster-9767.4369	8	3.86	0.96	0.43	-1.0589	1
Cluster-7214.0	2	4	0.35	0.65	0.94111	1
Cluster-9767.4360	37.92	34.92	4.8	4.08	-0.17754	1
Cluster-9767.7174	19.9	17.59	2.25	1.84	-0.2109	1
Cluster-9767.4362	25	42	7.72	12	0.68957	1
Cluster-9767.4363	0	0	0	0	NA	NA
Cluster-8076.0	2	2	6.23	5.38	-0.058894	1
Cluster-9767.4365	38.19	50	2.39	2.89	0.33703	1
Cluster-9767.4366	43	50	15.63	16.83	0.1587	1
Cluster-9767.4367	0	1	0	1.41	Inf	1
Cluster-9296.0	5	13	0.95	2.29	1.3196	1
Cluster-4476.0	8	4	1.83	0.85	-1.0589	1
Cluster-4476.1	1	0	1.95	0	#NAME?	1
Cluster-9767.5016	0	0	0	0	NA	NA
Cluster-9767.15978	5.68	45.44	0.4	2.98	2.848	0.55701
Cluster-9767.15979	38	39	9.86	9.37	-0.021419	1
Cluster-9767.15970	161.23	180.62	3.66	3.79	0.11004	1
Cluster-9767.15971	142.13	142.26	4.45	4.12	-0.058894	1
Cluster-9767.15972	169	192	22.41	23.53	0.12519	1
Cluster-9767.15973	26.75	29.71	1.54	1.58	0.093109	1
Cluster-9767.15974	0	2.78	0	7.86	Inf	1
Cluster-9767.15975	22	17	3.04	2.17	-0.43086	1
Cluster-9767.15976	203.03	239.18	7.84	8.53	0.17664	1
Cluster-9767.15977	61	40	13.14	7.97	-0.6677	1
Cluster-8494.0	8.68	1.38	0.91	0.13	-3.2288	1
Cluster-9767.27501	865.66	762.57	21.53	17.51	-0.24158	1
Cluster-8532.0	9.5	11.17	2.17	2.36	0.23061	1
Cluster-7315.0	1	0	0.62	0	#NAME?	1
Cluster-3188.0	2	3	0.86	1.19	0.52607	1
Cluster-8280.0	48.92	22	4.54	1.89	-1.2142	1
Cluster-9767.3278	20	80	2.43	8.98	1.9411	0.82278
Cluster-2703.0	1	0	1.83	0	#NAME?	1
Cluster-4680.1	10	13	1.35	1.62	0.31962	1
Cluster-4680.0	0	1	0	0.43	Inf	1
Cluster-5872.0	9	0	4.27	0	#NAME?	1
Cluster-9767.16409	4	11	9.5	23.02	1.4005	1
Cluster-9767.16408	104.14	64.52	8.08	4.63	-0.73697	1
Cluster-9767.9419	4.67	6.8	2.03	2.74	0.42653	1
Cluster-9767.9418	0	1	0	2.51	Inf	1
Cluster-9767.16401	349	291	49.59	38.22	-0.3211	1
Cluster-9767.9414	88.36	67.17	4.17	2.92	-0.45224	1
Cluster-9767.9417	0	2	0	5.38	Inf	1
Cluster-9767.16402	756	616	43.26	32.56	-0.35435	1
Cluster-9767.9411	28	42	5.84	8.09	0.52607	1
Cluster-9767.16404	1	0	0.87	0	#NAME?	1
Cluster-9767.9413	121	111	10.17	8.62	-0.18334	1
Cluster-9767.9412	0	16	0	6.87	Inf	0.52121
Cluster-4468.0	1.19	2.64	0.64	1.3	1.5261	1
Cluster-6274.0	0	0	0	0	NA	NA
Cluster-9767.13623	1018	958	80.17	69.7	-0.14653	1
Cluster-5629.0	0	0	0	0	NA	NA
Cluster-9767.13620	2	2	5.92	5.13	-0.058894	1
Cluster-9767.18633	101.92	58.8	2.89	1.54	-0.84868	1
Cluster-2258.0	8	5	2.64	1.53	-0.73697	1
Cluster-2992.0	0	0	0	0	NA	NA
Cluster-9767.18634	1441	1540	41.72	41.18	0.036966	1
Cluster-6879.0	7	6	1.55	1.22	-0.28129	1
Cluster-9767.18635	62.11	33.5	15.86	7.91	-0.9687	1
Cluster-9767.13624	0	0	0	0	NA	NA
Cluster-7950.0	0	4	0	1.35	Inf	1
Cluster-4412.0	8	4	14.34	6.43	-1.0589	1
Cluster-9767.18637	819	584	46.91	30.9	-0.54679	1
Cluster-8254.0	0	0	0	0	NA	NA
Cluster-9767.18540	19.89	10.67	1.12	0.56	-0.92139	1
Cluster-5752.0	2	2	2.97	2.68	-0.058894	1
Cluster-3997.0	0	0	0	0	NA	NA
Cluster-3611.0	127.42	93.52	6.24	4.23	-0.49299	1
Cluster-909.0	1	6	0.21	1.16	2.5261	1
Cluster-8446.0	0	0	0	0	NA	NA
Cluster-41.0	0	4	0	1.67	Inf	1
Cluster-9767.14049	102	100	37.3	33.85	-0.087463	1
Cluster-9767.2038	3	1	1.17	0.36	-1.6439	1
Cluster-9767.2039	94.53	80.29	4.77	3.74	-0.30682	1
Cluster-80.0	0	2	0	2.18	Inf	1
Cluster-9767.2032	2.48	7.72	0.42	1.2	1.9411	1
Cluster-9767.2033	2	0	11.24	0	#NAME?	1
Cluster-9767.2030	5	4	1.29	0.95	-0.38082	1
Cluster-9767.2031	43.33	77.49	4.28	7.07	0.78163	1
Cluster-9767.20776	357.16	299.69	9.53	7.38	-0.30986	1
Cluster-9767.2037	7.22	10.25	0.64	0.84	0.45568	1
Cluster-9767.2034	0	0	0	0	NA	NA
Cluster-9767.2035	0	10	0	1.34	Inf	1
Cluster-9767.14043	367	443	34.21	38.16	0.21263	1
Cluster-9767.37709	291	241	11.81	9.04	-0.33088	1
Cluster-9767.11030	67	27	14.59	5.44	-1.3701	1
Cluster-9767.37707	134	139	9.72	9.31	-0.0060418	1
Cluster-9767.37706	72	83	10.03	10.69	0.14622	1
Cluster-9767.20777	17	24	8.99	11.74	0.43861	1
Cluster-9767.37704	122.56	124.99	2.76	2.6	-0.035624	1
Cluster-9767.37703	21.44	18.01	0.49	0.38	-0.28129	1
Cluster-9767.11033	0	0	0	0	NA	NA
Cluster-9767.37701	2	0	5.35	0	#NAME?	1
Cluster-9767.37700	6	8	4.83	5.94	0.35614	1
Cluster-9767.10803	23	17	4.38	2.99	-0.49499	1
Cluster-9767.10802	248	164	21.65	13.23	-0.65554	1
Cluster-9767.10801	2	7	0.21	0.67	1.7485	1
Cluster-9767.10800	6.43	5.75	1.97	1.63	-0.058894	1
Cluster-9767.10807	3	7	2.21	4.75	1.1635	1
Cluster-9767.10806	6	4	5.83	3.57	-0.64386	1
Cluster-9767.10805	44.37	73	3.56	5.42	0.6715	1
Cluster-9767.10804	2.63	0	0.49	0	#NAME?	1
Cluster-9620.0	1	2	0.3	0.55	0.94111	1
Cluster-9767.14047	68	40	18.33	9.97	-0.82443	1
Cluster-9767.10809	4	0	0.85	0	#NAME?	1
Cluster-9767.10808	0	2	0	18.42	Inf	1
Cluster-6076.0	6	13	0.58	1.15	1.0566	1
Cluster-9767.11034	6	3	27.02	11.3	-1.0589	1
Cluster-7461.0	32	37	5.2	5.56	0.15056	1
Cluster-8495.1	0	3	0	1.42	Inf	1
Cluster-8495.0	0	4	0	0.6	Inf	1
Cluster-4393.0	0	5	0	1.28	Inf	1
Cluster-9767.14044	14	14	2.73	2.52	-0.058894	1
Cluster-8709.0	6	1	1.22	0.19	-2.6439	1
Cluster-9352.0	2	5	0.46	1.05	1.263	1
Cluster-5637.0	0	0	0	0	NA	NA
Cluster-9767.17461	138.49	187.53	5.04	6.31	0.38717	1
Cluster-9767.17462	50.51	66.47	2.26	2.74	0.31308	1
Cluster-9767.17463	34	38	13.86	14.34	0.10157	1
Cluster-9767.17464	448.61	254.1	32.28	16.89	-0.88078	1
Cluster-9767.17465	664	721	21.67	21.73	0.059922	1
Cluster-9767.17466	86	88	3.63	3.43	-0.025727	1
Cluster-9767.17467	0	13	0	5.88	Inf	0.79941
Cluster-9767.17468	49	73	16.76	23.11	0.51622	1
Cluster-9767.17469	34	30	16.74	13.67	-0.23947	1
Cluster-5596.0	6	2	1.93	0.59	-1.6439	1
Cluster-5596.1	1	0	0.34	0	#NAME?	1
Cluster-9767.20775	0	0	0	0	NA	NA
Cluster-4539.0	0	0	0	0	NA	NA
Cluster-5143.1	0	0	0	0	NA	NA
Cluster-9767.3276	31	32	10.49	10.02	-0.01309	1
Cluster-4114.0	11	6	1.49	0.75	-0.93336	1
Cluster-9767.41184	56.17	61.97	2.21	2.26	0.087948	1
Cluster-9767.41185	5.19	6.09	0.37	0.4	0.20414	1
Cluster-9767.41186	137.45	116.71	2.77	2.17	-0.28656	1
Cluster-9767.41187	74.37	111.99	1.6	2.22	0.53901	1
Cluster-9767.41180	3	5	1.14	1.76	0.67807	1
Cluster-9767.41181	4	11.46	0.27	0.72	1.4005	1
Cluster-9767.41182	3	8	1.74	4.3	1.3561	1
Cluster-9767.41183	11.33	14.57	0.64	0.76	0.38857	1
Cluster-1368.0	0	0	0	0	NA	NA
Cluster-9767.41188	1	6.51	0.48	2.88	2.7485	1
Cluster-9767.41189	2	4.49	1.07	2.21	0.94111	1
Cluster-9767.398	0	0	0	0	NA	NA
Cluster-9767.399	22	33	2.25	3.12	0.52607	1
Cluster-9767.2048	12	10	21.51	16.07	-0.32193	1
Cluster-9767.29133	43.4	112.72	2.77	6.63	1.335	1
Cluster-9767.390	0	0	0	0	NA	NA
Cluster-9767.391	21	13	5.43	3.11	-0.75077	1
Cluster-9767.392	0	0	0	0	NA	NA
Cluster-9767.393	24.47	15.36	1.94	1.13	-0.73697	1
Cluster-9767.394	0	0	0	0	NA	NA
Cluster-9767.395	11	13	7.07	7.73	0.18211	1
Cluster-9767.396	0	0	0	0	NA	NA
Cluster-9767.34417	0	0	0	0	NA	NA
Cluster-2256.0	0	25.61	0	1.27	Inf	0.12603
Cluster-9767.1073	0	167	0	7.25	Inf	1.53E-08
Cluster-9767.1072	0	5	0	3.12	Inf	1
Cluster-9767.1071	0	0	0	0	NA	NA
Cluster-9767.1070	20	39	2.41	4.34	0.90458	1
Cluster-9767.1077	0	0	0	0	NA	NA
Cluster-9767.1076	1.13	0	0.19	0	#NAME?	1
Cluster-9767.1075	2	0	33.07	0	#NAME?	1
Cluster-9767.1074	17	19	2.89	2.98	0.10157	1
Cluster-9767.1079	1	2	0.65	1.2	0.94111	1
Cluster-9767.1078	0	1.06	0	0.21	Inf	1
Cluster-9767.2041	0	0	0	0	NA	NA
Cluster-9767.2040	2.52	23.89	0.28	2.47	2.9411	1
Cluster-9767.41458	3	2	0.79	0.49	-0.64386	1
Cluster-9767.41459	0	0	0	0	NA	NA
Cluster-9767.41456	29	42	2.86	3.83	0.47544	1
Cluster-9767.41457	1	2	0.44	0.82	0.94111	1
Cluster-9767.41454	5	2	5.07	1.86	-1.3808	1
Cluster-9767.41455	0	1.33	0	0.18	Inf	1
Cluster-9767.41452	2	2	0.75	0.7	-0.058894	1
Cluster-9767.41453	8	10	5.69	6.57	0.26303	1
Cluster-9767.41450	18.93	19.57	3.08	2.94	0.015107	1
Cluster-9767.41451	1.16	3	0.57	1.36	1.5261	1
Cluster-9767.13891	39	47	0.97	1.08	0.21029	1
Cluster-1362.0	2	0	0.78	0	#NAME?	1
Cluster-9767.13890	0	4	0	2.81	Inf	1
Cluster-9754.0	2	7	1.07	3.45	1.7485	1
Cluster-9754.1	94	51	5.35	2.68	-0.94106	1
Cluster-9767.13892	646.94	676.79	12.61	12.18	0.0064964	1
Cluster-9767.21010	125	107	9.94	7.86	-0.28321	1
Cluster-9767.12168	50	56	4.81	4.98	0.10461	1
Cluster-9767.37242	11.99	14	1.11	1.2	0.1635	1
Cluster-2856.0	0	0	0	0	NA	NA
Cluster-2856.1	5	1	2.5	0.46	-2.3808	1
Cluster-2856.2	12.45	0	0.45	0	#NAME?	0.80656
Cluster-9767.37243	1	6	3.2	16.55	2.5261	1
Cluster-9767.10111	0	0	0	0	NA	NA
Cluster-9767.10110	199	254	10.74	12.66	0.29317	1
Cluster-9767.10113	80.48	71.05	7.81	6.37	-0.23107	1
Cluster-9767.10112	297.1	213.37	18.08	11.99	-0.5385	1
Cluster-9767.10115	85.51	64.65	4.32	3.02	-0.46279	1
Cluster-9767.10114	0	0	0	0	NA	NA
Cluster-9767.10117	3	0	1.44	0	#NAME?	1
Cluster-9767.10116	75.49	71.35	3.82	3.33	-0.13797	1
Cluster-9767.10119	66.15	90.44	6.46	8.16	0.38857	1
Cluster-9767.10118	358	372	10.63	10.2	-0.0035507	1
Cluster-9767.37241	39.16	22.74	7.61	4.09	-0.82073	1
Cluster-2935.0	0	0	0	0	NA	NA
Cluster-9767.25368	13641	12019	926.89	754.44	-0.24153	1
Cluster-9767.11448	26	21	12.61	9.43	-0.36702	1
Cluster-9767.11449	24	42	2.66	4.3	0.74846	1
Cluster-9767.11444	0	0	0	0	NA	NA
Cluster-9767.11445	0	1.97	0	0.2	Inf	1
Cluster-7683.1	4	2	1.45	0.67	-1.0589	1
Cluster-7683.0	0	0	0	0	NA	NA
Cluster-9767.11440	161	179	30	30.84	0.094005	1
Cluster-9767.11441	2	2	5.1	4.47	-0.058894	1
Cluster-9767.11442	1	3	9.25	21.55	1.5261	1
Cluster-9767.11443	136.83	222.88	20.4	30.72	0.64397	1
Cluster-9767.22745	29473.36	43318.93	1255.01	1703.69	0.49671	1
Cluster-9767.22744	2184.47	2225.86	29.38	27.65	-0.031413	1
Cluster-9767.22747	3445.26	2721.2	734.91	536.81	-0.39926	1
Cluster-9767.22746	17614.05	21125.36	720.51	798.14	0.20334	1
Cluster-9767.22741	5352.64	5911.07	205.19	209.28	0.084161	1
Cluster-9767.22740	8194	3159	178.85	63.68	-1.434	0.016307
Cluster-9767.22743	480.87	413.37	31.11	24.7	-0.27879	1
Cluster-9767.22742	5796	5096	287.54	233.51	-0.24459	1
Cluster-9174.0	1	4	0.61	2.25	1.9411	1
Cluster-9767.22749	608.9	861.88	15.41	20.14	0.44235	1
Cluster-9767.22748	1145.46	1134.97	91.11	83.4	-0.071549	1
Cluster-9767.30620	101.19	87.06	2	1.59	-0.27416	1
Cluster-9767.14501	112.18	418.49	1.81	6.23	1.8411	0.038146
Cluster-9767.5233	0	0	0	0	NA	NA
Cluster-9767.15563	0	0	0	0	NA	NA
Cluster-9767.15562	0	0	0	0	NA	NA
Cluster-9767.15561	16.18	5.27	5.33	1.61	-1.737	1
Cluster-6521.0	0	1	0	0.73	Inf	1
Cluster-7693.0	22	2	2.17	0.18	-3.5183	0.8076
Cluster-7693.1	13	11	2.67	2.09	-0.2999	1
Cluster-9767.15565	81.42	77.45	3	2.63	-0.13196	1
Cluster-9767.15564	0	2	0	32.31	Inf	1
Cluster-9767.15569	19	19	6.07	5.62	-0.058894	1
Cluster-9767.15568	781	732	16.12	13.95	-0.15237	1
Cluster-8872.0	23.17	21	0.98	0.82	-0.19014	1
Cluster-9767.11996	0	0	0	0	NA	NA
Cluster-9767.11997	0	0	0	0	NA	NA
Cluster-9767.11994	7.14	8.32	3.9	4.21	0.13375	1
Cluster-9767.11995	4.86	8.68	2.16	3.57	0.7891	1
Cluster-9767.11992	1	1	0.69	0.64	-0.058894	1
Cluster-9767.11993	0	0	0	0	NA	NA
Cluster-9767.11990	846	776	63.62	53.91	-0.18349	1
Cluster-9767.21987	23.2	33.03	2.4	3.15	0.46194	1
Cluster-7500.0	28.01	6.26	2.35	0.49	-2.2813	1
Cluster-9767.21984	224	197	25.63	20.83	-0.2442	1
Cluster-9767.11998	46.73	0	3.57	0	#NAME?	0.0054494
Cluster-9767.11999	55	68	5.29	6.04	0.24721	1
Cluster-9767.21985	41	59	27.71	36.85	0.4662	1
Cluster-9767.21982	358	430	278.29	308.36	0.20548	1
Cluster-9767.21983	3384.66	6347.31	206.73	358.12	0.84803	0.77855
Cluster-9767.15695	10	10	24.88	21.86	-0.058894	1
Cluster-9767.15694	101	90	4.82	3.97	-0.22525	1
Cluster-9767.15697	92.73	138.01	3.06	4.2	0.51047	1
Cluster-3724.0	6	6	2.07	1.92	-0.058894	1
Cluster-9767.15691	74	98	19.05	23.34	0.34636	1
Cluster-9767.15690	2	0	10.2	0	#NAME?	1
Cluster-9767.15693	981	1080	16.27	16.54	0.079813	1
Cluster-9767.15692	284	271	15.67	13.81	-0.12649	1
Cluster-1857.0	2	1	4.24	1.88	-1.0589	1
Cluster-9767.39852	9	12	2.06	2.54	0.35614	1
Cluster-9767.15699	1	0	4.94	0	#NAME?	1
Cluster-9767.15698	0	0	0	0	NA	NA
Cluster-5650.0	12	1	7.09	0.55	-3.6439	1
Cluster-9767.41722	0	0	0	0	NA	NA
Cluster-9767.25218	830.77	1091.05	18.05	21.89	0.33384	1
Cluster-9767.25219	3	5	0.37	0.57	0.67807	1
Cluster-6676.0	1	9	0.34	2.86	3.111	1
Cluster-4349.0	0	0	0	0	NA	NA
Cluster-9767.25212	588	456	106.45	76.33	-0.42568	1
Cluster-9767.25213	352	356	23.89	22.32	-0.042592	1
Cluster-9767.25210	308	246.33	9.69	7.16	-0.38317	1
Cluster-9767.25211	530	468	116.18	94.88	-0.23838	1
Cluster-9767.25216	77	68	48.11	39.29	-0.23822	1
Cluster-9767.25217	2	0	1.23	0	#NAME?	1
Cluster-9767.25214	758	709	31.43	27.15	-0.15531	1
Cluster-9767.25215	314	241	165.99	117.91	-0.44063	1
Cluster-9767.24241	2942	3827	433.6	521.36	0.32052	1
Cluster-6733.0	20.03	63.02	1.36	3.94	1.5965	1
Cluster-6733.1	12.12	21.25	0.75	1.22	0.74846	1
Cluster-9766.0	9	7	2.85	2.05	-0.42146	1
Cluster-6733.2	32.85	21.74	2.02	1.23	-0.64386	1
Cluster-9767.18804	27	18	4.9	3.02	-0.64386	1
Cluster-5015.0	18	25	0.85	1.1	0.41504	1
Cluster-9767.6071	2	0	3.89	0	#NAME?	1
Cluster-9767.25078	419	355	11.62	9.09	-0.29802	1
Cluster-9767.25079	79.66	53.94	1.87	1.17	-0.62593	1
Cluster-9767.22394	7159.12	7193.19	303.62	281.76	-0.052058	1
Cluster-9767.41608	0	0	0	0	NA	NA
Cluster-9767.12399	5	12	2	4.44	1.2041	1
Cluster-390.0	2	1	1.13	0.52	-1.0589	1
Cluster-9767.19249	849	789	58.82	50.5	-0.16463	1
Cluster-7417.0	0	0	0	0	NA	NA
Cluster-9767.25077	90	99	7.72	7.85	0.07861	1
Cluster-6640.0	2	6	1.17	3.25	1.5261	1
Cluster-9767.13598	169.5	160.45	16.74	14.64	-0.13785	1
Cluster-9767.13599	6.23	21.48	0.47	1.48	1.7485	1
Cluster-9767.5239	12.4	18.66	4.43	6.17	0.60407	1
Cluster-9767.22390	0	0	0	0	NA	NA
Cluster-9767.37456	38.24	57.91	1.63	2.29	0.55116	1
Cluster-9767.13590	9	6	3.77	2.32	-0.64386	1
Cluster-9767.25072	21	32	11.67	16.46	0.54879	1
Cluster-9767.13592	4	3.98	1.66	1.53	-0.058894	1
Cluster-9767.13593	14	20	3.22	4.26	0.45568	1
Cluster-9767.13594	0	1.26	0	0.75	Inf	1
Cluster-9767.13595	0	1	0	3.77	Inf	1
Cluster-9767.36854	0	0	0	0	NA	NA
Cluster-9767.13597	88.16	67.73	6.37	4.52	-0.43086	1
Cluster-8235.0	1	0	4.94	0	#NAME?	1
Cluster-9819.0	2	7	1.25	4.04	1.7485	1
Cluster-9767.30486	124.56	117.24	13.78	11.98	-0.15431	1
Cluster-1594.0	0	0	0	0	NA	NA
Cluster-9767.30481	97.39	87.3	3.41	2.82	-0.21586	1
Cluster-9767.25071	48.32	51.66	3.93	3.88	0.056584	1
Cluster-9767.30480	87.7	130.52	21.87	30.11	0.5151	1
Cluster-9810.1	8	19	0.66	1.46	1.189	1
Cluster-9767.30483	53	74	3.32	4.29	0.42264	1
Cluster-9767.37450	31.99	36.66	2.61	2.76	0.15056	1
Cluster-9767.17879	0	0	0	0	NA	NA
Cluster-9767.17878	1802	2123	44.65	48.58	0.17761	1
Cluster-9767.19244	644.1	713.16	20.93	21.41	0.087948	1
Cluster-9767.19859	356	373	16.77	16.23	0.0084047	1
Cluster-9767.19858	31	40	4.48	5.34	0.30884	1
Cluster-9767.17873	626	1083	79.04	126.37	0.7319	1
Cluster-9767.19856	2	1	10.88	4.47	-1.0589	1
Cluster-9767.19855	1514	1933	91.5	107.92	0.29358	1
Cluster-9767.19854	413	667	13.46	20.08	0.63265	1
Cluster-9767.19853	48.92	49.04	7.33	6.79	-0.058894	1
Cluster-9767.19852	3321	3084	78.63	67.43	-0.16571	1
Cluster-9767.17875	5	10	36.99	58.87	0.94111	1
Cluster-9767.17874	2	2	30.26	22.27	-0.058894	1
Cluster-3451.0	5	5	1.27	1.18	-0.058894	1
Cluster-9767.39047	57.37	95.12	0.73	1.12	0.67807	1
Cluster-9767.39044	0	0	0	0	NA	NA
Cluster-9767.39045	89	168	11.78	20.54	0.85769	1
Cluster-9767.39042	133.4	116.4	4.47	3.6	-0.2562	1
Cluster-9767.39043	2	1	9.58	3.98	-1.0589	1
Cluster-9767.39040	0	0	0	0	NA	NA
Cluster-9767.39041	140.59	140.05	8.5	7.83	-0.069162	1
Cluster-7217.0	0	6.68	0	1.05	Inf	1
Cluster-9767.39048	43.69	98.71	0.56	1.18	1.111	1
Cluster-9767.39049	0	1	0	5.89	Inf	1
Cluster-9767.17701	1	1	0.73	0.67	-0.058894	1
Cluster-9767.38939	9	13	4.84	6.47	0.47162	1
Cluster-9767.38938	43.34	57.01	1.29	1.57	0.34773	1
Cluster-9767.17700	58	60	3.02	2.89	-0.0099841	1
Cluster-9767.38935	55	62	3.23	3.37	0.11394	1
Cluster-9767.38934	54.32	84.81	6.93	10	0.59561	1
Cluster-9767.38937	2	1	0.61	0.28	-1.0589	1
Cluster-9767.38936	113.31	115	2.61	2.45	-0.033583	1
Cluster-9767.38931	301.72	551.9	5.24	8.86	0.81123	1
Cluster-9767.38930	0	0	0	0	NA	NA
Cluster-9767.38933	3	0	1.65	0	#NAME?	1
Cluster-9767.38932	0	0	0	0	NA	NA
Cluster-3976.0	0	4	0	0.95	Inf	1
Cluster-9767.8716	36	57	4.65	6.8	0.60407	1
Cluster-8321.0	0	15.56	0	1.56	Inf	0.52121
Cluster-9767.17705	0	0	0	0	NA	NA
Cluster-9767.8710	4	1	1.15	0.27	-2.0589	1
Cluster-9767.23665	99.56	179.9	7.4	12.35	0.7891	1
Cluster-1577.0	2	2	1.89	1.74	-0.058894	1
Cluster-9767.17707	75	85	48.23	50.54	0.12168	1
Cluster-4012.0	1	4	0.97	3.57	1.9411	1
Cluster-9767.38431	77.72	88.73	2.9	3.06	0.13144	1
Cluster-9767.8712	1	3	4.37	10.99	1.5261	1
Cluster-9767.28918	36.52	56.51	2.77	3.95	0.56454	1
Cluster-9767.23667	106.33	215.32	3.65	6.83	0.96138	1
Cluster-9767.21465	202	159	11.94	8.68	-0.40422	1
Cluster-9767.21464	12	8	2.23	1.37	-0.64386	1
Cluster-9767.21467	1213	1055	18.15	14.57	-0.26023	1
Cluster-9767.21466	2950.54	3903.47	57.67	70.46	0.34449	1
Cluster-9767.21461	2355	2456	49.32	47.5	0.0016898	1
Cluster-9767.21460	3191	3594	492.02	512.26	0.11269	1
Cluster-9767.21463	127.12	184.77	3.54	4.75	0.4838	1
Cluster-9767.21462	240	300	20.96	24.2	0.26303	1
Cluster-9767.38434	68	51	8.6	5.96	-0.47393	1
Cluster-9767.21469	2138	2597	45.4	50.93	0.22169	1
Cluster-9767.21468	4100	4973	121.48	136.08	0.2196	1
Cluster-9767.38435	59	37.2	11.47	6.68	-0.73208	1
Cluster-9767.23663	314.53	342.51	14.6	14.68	0.063963	1
Cluster-3445.0	1	0	15.81	0	#NAME?	1
Cluster-7316.0	4.42	5.71	0.71	0.84	0.52607	1
Cluster-9767.38437	0	0	0	0	NA	NA
Cluster-1380.0	8	3	1.4	0.49	-1.4739	1
Cluster-6935.0	0	0	0	0	NA	NA
Cluster-9767.27108	1053	1250	42.23	46.3	0.18853	1
Cluster-9767.27109	1130.87	1172.94	63.79	61.11	-0.0062896	1
Cluster-9767.20338	871.49	645.65	33.8	23.12	-0.49003	1
Cluster-9767.20339	11	12	4.02	4.06	0.066637	1
Cluster-6209.0	0	5	0	1.28	Inf	1
Cluster-3948.0	8	14	1.79	2.9	0.74846	1
Cluster-9767.27100	492	362	64.83	44.08	-0.50156	1
Cluster-9767.27101	704	569	83.56	62.41	-0.36604	1
Cluster-9767.27102	249	281	13.28	13.84	0.11553	1
Cluster-9767.20331	4364	4645	195.82	192.51	0.031134	1
Cluster-9767.20336	1964	1703	78.02	62.49	-0.26461	1
Cluster-9767.27105	200	217	24.15	24.21	0.058801	1
Cluster-4687.0	0	0	0	0	NA	NA
Cluster-9767.27107	43	44	15.2	14.4	-0.025727	1
Cluster-1823.0	7	15	1.52	3.02	1.0406	1
Cluster-9767.5219	65	114	0.83	1.34	0.75163	1
Cluster-9767.5218	0	0	0	0	NA	NA
Cluster-9767.23829	137	209	22.09	31.15	0.55043	1
Cluster-9767.23828	1710	1546	54.65	45.63	-0.20435	1
Cluster-9767.23827	9	5	5.18	2.66	-0.90689	1
Cluster-9767.5212	0	18.07	0	1.93	Inf	0.38915
Cluster-9767.23825	93	133	70.68	93.28	0.45723	1
Cluster-9767.23824	1753	1792	57.38	54.18	-0.027149	1
Cluster-9767.23823	443	582.55	45.66	55.48	0.3373	1
Cluster-9767.23822	3517.47	4585.23	12.59	15.16	0.32368	1
Cluster-9767.5215	42	45.59	4.56	4.57	0.072351	1
Cluster-9767.5214	0	0	0	0	NA	NA
Cluster-9767.18065	243.38	248.4	22.72	21.43	-0.02951	1
Cluster-9767.18064	5233	14242	183.11	460.27	1.3855	0.037432
Cluster-9767.18067	80.73	66.09	11.07	8.38	-0.35435	1
Cluster-9767.18066	52	64	5.15	5.86	0.24067	1
Cluster-9767.18061	1517.81	1559.39	26.35	25	-0.020445	1
Cluster-9767.18060	11	19	4.79	7.66	0.7296	1
Cluster-9767.18063	1	2	7.67	12.16	0.94111	1
Cluster-9767.18062	296	340	23.34	24.77	0.14104	1
Cluster-9767.18069	1134	1167	42.29	40.2	-0.01751	1
Cluster-9767.18068	7.61	11.91	4.54	6.57	0.52607	1
Cluster-1234.0	22	25	30.4	31.36	0.12553	1
Cluster-9767.14007	110.59	236.21	2.23	4.39	1.0293	1
Cluster-8676.0	8	7	2.29	1.86	-0.25154	1
Cluster-9767.976	13	11	2.36	1.85	-0.2999	1
Cluster-7054.2	2	0	25.49	0	#NAME?	1
Cluster-9767.26279	117.34	230.62	20.54	37.32	0.92249	1
Cluster-9767.26278	10	23	6.9	14.66	1.1427	1
Cluster-9767.30588	167	131	9.66	7	-0.40917	1
Cluster-9767.30589	131.26	362.41	8.06	20.55	1.4075	0.35568
Cluster-9767.26271	179.13	308.68	29.41	46.85	0.72875	1
Cluster-9767.30585	0	0	0	0	NA	NA
Cluster-9767.30586	0	0	0	0	NA	NA
Cluster-9767.30587	352	301	12.73	10.06	-0.28471	1
Cluster-9767.26275	1197.12	1281.4	25.82	25.52	0.038954	1
Cluster-9767.30581	0	0	0	0	NA	NA
Cluster-9767.30582	1	0	0.33	0	#NAME?	1
Cluster-9767.26276	443.31	474.93	16.48	16.3	0.041727	1
Cluster-5128.1	0	18.77	0	0.53	Inf	0.33697
Cluster-3994.0	8	14	0.62	1	0.74846	1
Cluster-9767.12962	7	12	2.52	3.99	0.71871	1
Cluster-9767.12963	34	48	10.11	13.2	0.43861	1
Cluster-9767.4168	6	12	1.07	1.97	0.94111	1
Cluster-9767.4169	0	0	0	0	NA	NA
Cluster-9767.12966	6	8	0.77	0.95	0.35614	1
Cluster-9767.12967	0	0	0	0	NA	NA
Cluster-9767.12964	0	0	0	0	NA	NA
Cluster-9767.12965	2	6	3.31	8.95	1.5261	1
Cluster-9767.4162	1	0	2.49	0	#NAME?	1
Cluster-9767.4163	0	0	0	0	NA	NA
Cluster-9767.12968	0	0	0	0	NA	NA
Cluster-9767.4161	0	1	0	11.58	Inf	1
Cluster-9767.4166	3	2	27.74	14.36	-0.64386	1
Cluster-9767.4167	8.6	17.16	0.55	1.01	0.85864	1
Cluster-9767.4164	6	5	23.3	16.46	-0.32193	1
Cluster-9767.4165	204	190	11.78	10.13	-0.16146	1
Cluster-8966.0	0	0	0	0	NA	NA
Cluster-9767.23179	45.04	23.64	5.06	2.45	-0.96578	1
Cluster-9767.23178	17330.9	21183.62	172.66	194.88	0.23073	1
Cluster-9767.23175	429.11	376.93	5.29	4.29	-0.24531	1
Cluster-9767.23174	37237	70214	229.16	399	0.85613	1
Cluster-9767.23177	617.03	934.78	21.02	29.41	0.5408	1
Cluster-9696.0	4	5	0.57	0.66	0.26303	1
Cluster-9767.23171	55	47	40	31.56	-0.28566	1
Cluster-9767.23170	8464.66	18074	281.88	555.88	1.0354	0.44774
Cluster-9767.23173	33	44	14.18	17.5	0.35614	1
Cluster-9767.23172	30909	30757	1550.37	1425	-0.066006	1
Cluster-1839.0	2	0	1.31	0	#NAME?	1
Cluster-890.0	0	2	0	1.08	Inf	1
Cluster-9461.0	1	5	0.22	1.03	2.263	1
Cluster-9767.30904	0	0	0	0	NA	NA
Cluster-4489.0	4	2	1.65	0.76	-1.0589	1
Cluster-9767.22886	946	1011	35.83	35.37	0.036977	1
Cluster-9767.22887	44.18	45.17	2.45	2.31	-0.026472	1
Cluster-9767.31989	17	27	1.86	2.73	0.60853	1
Cluster-9767.31988	472.5	487.06	18.41	17.53	-0.013759	1
Cluster-9767.22882	5520	4631	542.48	420.53	-0.31224	1
Cluster-9767.22883	51.39	79.09	2.62	3.72	0.57246	1
Cluster-9767.22880	1364.15	1816.27	59.44	73.1	0.35403	1
Cluster-9767.22881	5243	4486	1161.36	919	-0.28386	1
Cluster-9767.31983	17	20	1.61	1.75	0.17557	1
Cluster-9767.31982	401	386	11.33	10.07	-0.1139	1
Cluster-9767.31981	138.52	130.28	5.11	4.44	-0.15547	1
Cluster-9767.31980	33	29	3.82	3.11	-0.24531	1
Cluster-9767.31987	2.14	0	0.4	0	#NAME?	1
Cluster-9767.31986	1	14	0.26	3.31	3.7485	1
Cluster-4773.0	5	2	1.5	0.56	-1.3808	1
Cluster-4773.1	1	2	0.49	0.91	0.94111	1
Cluster-857.0	1	1	0.48	0.44	-0.058894	1
Cluster-857.1	17	28	5.72	8.72	0.661	1
Cluster-9767.18939	1677	1848	39.71	40.41	0.081188	1
Cluster-9767.18938	380	288	63.87	44.75	-0.45882	1
Cluster-9767.18933	558	524	20.47	17.76	-0.14959	1
Cluster-9767.18932	6.28	18.14	0.79	2.11	1.5261	1
Cluster-9767.18931	58	79	13.92	17.53	0.38691	1
Cluster-9767.18930	0	2	0	28.41	Inf	1
Cluster-9767.18937	31	23	4.79	3.29	-0.48953	1
Cluster-9767.18936	56.09	82.52	23.32	31.76	0.50879	1
Cluster-9767.18935	1785	1701	178.18	156.9	-0.12843	1
Cluster-9767.18934	270	257	12.64	11.12	-0.13008	1
Cluster-9767.34005	11	15	4.29	5.42	0.38857	1
Cluster-9767.34004	1870.3	1915.9	31.48	29.78	-0.023834	1
Cluster-9767.34007	145.52	135.22	7.91	6.79	-0.1719	1
Cluster-9767.34006	47	41	18.34	14.81	-0.25593	1
Cluster-9767.34001	0	0	0	0	NA	NA
Cluster-9767.34000	6	15	0.88	2.03	1.263	1
Cluster-9767.34003	37	69	2.16	3.71	0.84018	1
Cluster-9767.34002	238	216	26.65	22.35	-0.19882	1
Cluster-9767.30259	1	2	0.56	1.04	0.94111	1
Cluster-9767.34009	189	169	18.81	15.54	-0.22026	1
Cluster-9767.34008	57.83	89.32	3.08	4.4	0.55886	1
Cluster-9767.18818	24	42	13.34	21.6	0.74846	1
Cluster-9767.31679	170.84	358.83	3.62	7.02	1.0111	1
Cluster-9767.31678	0	1	0	1.67	Inf	1
Cluster-9767.4978	0	3	0	4.48	Inf	1
Cluster-9767.31675	28.07	0	0.98	0	#NAME?	0.074346
Cluster-9767.19085	1	4	0.29	1.06	1.9411	1
Cluster-9767.31677	726	669	18.06	15.37	-0.17686	1
Cluster-9767.19087	126	188	18.19	25.09	0.51842	1
Cluster-9767.19080	395.83	557.83	28.98	37.73	0.43587	1
Cluster-9767.19081	0	0	0	0	NA	NA
Cluster-9767.31673	214	144	47.4	29.5	-0.63044	1
Cluster-9767.31672	12	21	3.96	6.41	0.74846	1
Cluster-9767.22222	0	0	0	0	NA	NA
Cluster-9767.29231	2.79	0	0.65	0	#NAME?	1
Cluster-9767.22220	82	47	7.58	4.01	-0.86186	1
Cluster-9767.29233	0	4	0	3.39	Inf	1
Cluster-9767.29234	30	35	4.93	5.31	0.1635	1
Cluster-9767.29235	2	1	0.88	0.41	-1.0589	1
Cluster-9767.9659	0	5	0	3.63	Inf	1
Cluster-9767.29237	12.14	0	0.52	0	#NAME?	0.80656
Cluster-9767.29238	96.06	49.55	6.32	3.01	-1	1
Cluster-9767.29239	544.35	726	10.86	13.38	0.35747	1
Cluster-9767.22228	184	143	74.55	53.64	-0.42258	1
Cluster-9767.9654	31	42	17.23	21.6	0.37923	1
Cluster-9767.9653	14	16	3.22	3.41	0.13375	1
Cluster-9767.9652	21	34	2.58	3.87	0.63625	1
Cluster-9767.9651	12	24	1.93	3.57	0.94111	1
Cluster-9767.9650	7	6	82.1	53.26	-0.28129	1
Cluster-9767.38584	6.11	16.55	0.27	0.67	1.4436	1
Cluster-9767.38585	187.89	133.45	8.05	5.28	-0.5582	1
Cluster-9767.35358	60.56	61.44	3.19	2.99	-0.058894	1
Cluster-9767.35359	79.02	66.33	3.18	2.46	-0.31828	1
Cluster-9767.38580	53.51	55.93	3.62	3.49	-0.0064263	1
Cluster-9767.38581	72.02	126.64	2.17	3.53	0.75987	1
Cluster-9767.38582	0.93	0	0.03	0	#NAME?	1
Cluster-9767.38583	36	47	7.65	9.24	0.32577	1
Cluster-9767.35352	12	4.54	1.04	0.36	-1.3219	1
Cluster-9767.35353	25.41	20	7.85	5.72	-0.38082	1
Cluster-6726.0	5	1	0.99	0.18	-2.3808	1
Cluster-9767.35351	9	9	5	4.63	-0.058894	1
Cluster-9767.35356	84.11	76.11	3.36	2.8	-0.20328	1
Cluster-9767.35357	0	0	0	0	NA	NA
Cluster-9767.35354	0	1	0	0.58	Inf	1
Cluster-9767.35355	80.18	58.94	5.11	3.47	-0.49818	1
Cluster-9767.3303	12.07	0	0.55	0	#NAME?	0.80656
Cluster-9767.3302	5	2	11.87	4.18	-1.3808	1
Cluster-9767.3301	20.39	8.29	1.44	0.54	-1.3808	1
Cluster-139.0	0	3	0	6.01	Inf	1
Cluster-9493.0	3	5	0.71	1.1	0.67807	1
Cluster-9767.3306	0	1	0	5.7	Inf	1
Cluster-9767.3305	0	1	0	7.97	Inf	1
Cluster-9767.3304	0	53.25	0	1.01	Inf	0.0037698
Cluster-9767.3309	0	0	0	0	NA	NA
Cluster-9767.3308	30	46	10.91	15.48	0.55778	1
Cluster-9767.13910	0	3	0	1.39	Inf	1
Cluster-9767.35668	2	1	13.78	5.52	-1.0589	1
Cluster-9767.38297	351.27	337.29	9.33	8.27	-0.11762	1
Cluster-9767.38058	286	299	15.01	14.5	0.0052366	1
Cluster-9767.38059	15.75	13.23	5.54	4.3	-0.35845	1
Cluster-7868.0	4	7	1.08	1.75	0.74846	1
Cluster-9767.38057	102.13	92.29	3.19	2.66	-0.20776	1
Cluster-9767.38054	8	15	6.84	11.81	0.848	1
Cluster-9767.38055	261.05	210.13	12.66	9.42	-0.37255	1
Cluster-9767.38052	0	0	0	0	NA	NA
Cluster-9767.38053	0	0	0	0	NA	NA
Cluster-9767.38050	0	0	0	0	NA	NA
Cluster-9767.38051	14	7	2.59	1.2	-1.0589	1
Cluster-9767.38292	0	1	0	3.21	Inf	1
Cluster-2151.0	2	3	1.71	2.36	0.52607	1
Cluster-6800.0	6	2	2.43	0.75	-1.6439	1
Cluster-9767.11370	9	13	8.3	11.02	0.47162	1
Cluster-9767.4779	0	0	0	0	NA	NA
Cluster-5318.0	8	2	2.78	0.64	-2.0589	1
Cluster-9767.36501	18.37	19.98	2	2.01	0.093109	1
Cluster-2670.0	5	3	2.29	1.27	-0.79586	1
Cluster-9483.2	22.42	33.35	1.76	2.42	0.52607	1
Cluster-9483.1	13.58	8.65	1.16	0.69	-0.69632	1
Cluster-9483.0	0	2	0	0.57	Inf	1
Cluster-9767.7530	0	0	0	0	NA	NA
Cluster-9767.7531	37.31	31.87	3.66	2.89	-0.26835	1
Cluster-9767.7532	1	10	0.28	2.62	3.263	1
Cluster-9767.7533	43	38	17.2	14.07	-0.23723	1
Cluster-9767.7534	7	5	2.7	1.78	-0.54432	1
Cluster-9767.22989	94.52	66.16	24.74	16.02	-0.58436	1
Cluster-9767.7536	10.44	12.52	3.41	3.78	0.31962	1
Cluster-9767.7537	155.85	178.74	26.69	28.3	0.13952	1
Cluster-5703.0	4	7	3.69	5.94	0.74846	1
Cluster-9767.7539	38.38	66.08	8.03	12.78	0.73757	1
Cluster-206.0	23.04	0	0.68	0	#NAME?	0.15375
Cluster-9767.22988	348.78	360.28	5.96	5.69	-0.014124	1
Cluster-5318.1	1	1	1.06	0.97	-0.058894	1
Cluster-9767.38299	22.04	40.18	2.24	3.78	0.8036	1
Cluster-9767.4773	3	6	8.23	14.35	0.94111	1
Cluster-2438.0	0	0	0	0	NA	NA
Cluster-9767.4772	2	8	2.31	8.45	1.9411	1
Cluster-9767.35665	84.37	123.62	9.88	13.38	0.50299	1
Cluster-9767.22985	222.97	364.42	3.86	5.83	0.648	1
Cluster-9767.12070	213	211	12.59	11.52	-0.072504	1
Cluster-9767.30209	1073	1034	41.28	36.74	-0.11231	1
Cluster-9767.30208	52	27	15.6	7.5	-1.0044	1
Cluster-2557.0	5	5	1.83	1.69	-0.058894	1
Cluster-9767.42122	3	0	4.01	0	#NAME?	1
Cluster-9767.30203	1	0	0.27	0	#NAME?	1
Cluster-9767.30202	54	67	12.72	14.59	0.25231	1
Cluster-9767.30201	125.49	106.24	58.22	45.63	-0.29676	1
Cluster-9767.30200	110.78	93.43	5.37	4.18	-0.31415	1
Cluster-9767.30207	292	291	12	11.04	-0.063843	1
Cluster-9767.30206	46.12	29	11.11	6.46	-0.72447	1
Cluster-9767.30205	1283	1558	92.22	103.45	0.22128	1
Cluster-9767.30204	203.24	210.08	10.54	10.06	-0.0099841	1
Cluster-9767.28541	6	4	1.08	0.67	-0.64386	1
Cluster-9767.28540	928.38	841.37	14.93	12.49	-0.20091	1
Cluster-9767.34919	2	3	7.34	9.38	0.52607	1
Cluster-9767.34918	1	1	1.29	1.18	-0.058894	1
Cluster-9767.28545	49	56	12.12	12.82	0.13375	1
Cluster-9767.28544	37	56	2.23	3.12	0.53901	1
Cluster-9767.28547	770	881	29.25	30.91	0.13539	1
Cluster-9767.28546	334.46	345.47	14.81	14.13	-0.012145	1
Cluster-9767.34913	33.14	39.47	1.5	1.65	0.18211	1
Cluster-9767.34912	93	116	11.98	13.81	0.25993	1
Cluster-9767.34911	0	4.01	0	13.21	Inf	1
Cluster-9767.34910	0	1	0	8.56	Inf	1
Cluster-9767.34917	2.52	17.05	0.38	2.36	2.4436	1
Cluster-9767.34916	1	0	2.03	0	#NAME?	1
Cluster-9767.34915	214	259	10.43	11.66	0.21645	1
Cluster-9767.42126	2	823	0.09	34.75	8.6259	1.42E-25
Cluster-9767.8214	2	8	6.23	21.53	1.9411	1
Cluster-9767.8215	1	5	2.22	9.81	2.263	1
Cluster-9767.8216	20	21	1.88	1.82	0.011496	1
Cluster-9767.8217	0	0	0	0	NA	NA
Cluster-9767.8210	0	0	0	0	NA	NA
Cluster-9767.8211	68	101	17.02	23.39	0.51185	1
Cluster-9767.8212	89	70	18.98	13.81	-0.40534	1
Cluster-9767.8213	0	3	0	1.77	Inf	1
Cluster-9767.32515	70.01	115.48	2.34	3.56	0.65731	1
Cluster-8895.0	9.77	2.9	1.11	0.3	-1.7959	1
Cluster-9767.32517	22	22	8.33	7.71	-0.058894	1
Cluster-9767.32516	21	25	9.74	10.74	0.19265	1
Cluster-9767.32511	63.59	157.32	2.51	5.73	1.2357	1
Cluster-9767.8219	77	62	23.44	17.46	-0.37148	1
Cluster-9767.32513	234	402	18.73	29.73	0.72179	1
Cluster-9767.32512	573.57	569.2	10.49	9.61	-0.071516	1
Cluster-9767.19186	903	912	33.23	31	-0.044586	1
Cluster-6328.0	5	5	3.15	2.92	-0.058894	1
Cluster-9767.29665	0	0	0	0	NA	NA
Cluster-7434.0	9	12	0.91	1.12	0.35614	1
Cluster-9548.0	2	1	26.58	9.92	-1.0589	1
Cluster-9767.4948	2	1	5.35	2.34	-1.0589	1
Cluster-9767.4949	0	13	0	1.12	Inf	0.79941
Cluster-9824.1	1.09	14.66	0.11	1.33	3.848	1
Cluster-9767.1539	0	0	0	0	NA	NA
Cluster-9303.0	5	9	1.21	2.01	0.7891	1
Cluster-9767.4941	1	1	0.55	0.51	-0.058894	1
Cluster-9767.4942	234	284	66.75	74.95	0.22049	1
Cluster-2547.0	1	6	1.06	5.81	2.5261	1
Cluster-833.0	2	3	0.63	0.88	0.52607	1
Cluster-9767.4945	0	0	0	0	NA	NA
Cluster-9767.4946	2	0	2.58	0	#NAME?	1
Cluster-9767.4947	1	0	0.58	0	#NAME?	1
Cluster-9767.39748	0	1	0	6.49	Inf	1
Cluster-1403.0	6	4.71	1.57	1.14	-0.32193	1
Cluster-9767.21142	907.15	688.07	59.53	41.71	-0.45759	1
Cluster-9767.24311	190.47	155.13	24.59	18.51	-0.35262	1
Cluster-9767.24312	0	1	0	6.71	Inf	1
Cluster-9767.159	84	93	6.77	6.93	0.087948	1
Cluster-9767.24314	522.43	553.64	9.83	9.62	0.026942	1
Cluster-9767.24315	548.35	441.34	10.4	7.73	-0.37229	1
Cluster-9767.21144	31	53	16.25	25.72	0.71483	1
Cluster-9767.24317	3204.65	3707.11	141.59	151.28	0.15103	1
Cluster-9767.152	0	0	0	0	NA	NA
Cluster-9767.24319	134	236	14.25	23.19	0.75766	1
Cluster-9767.150	0	0	0	0	NA	NA
Cluster-9767.151	1	0	1.99	0	#NAME?	1
Cluster-9767.156	5	3	1.57	0.87	-0.79586	1
Cluster-9767.157	0	0	0	0	NA	NA
Cluster-9767.154	54	124	7.67	16.29	1.1404	1
Cluster-9767.155	5	16	0.94	2.77	1.6192	1
Cluster-2242.0	4	5	2.19	2.53	0.26303	1
Cluster-9767.1275	4	7	0.69	1.12	0.74846	1
Cluster-9767.1274	19	26	2.14	2.7	0.39362	1
Cluster-9767.1277	0	4	0	2.9	Inf	1
Cluster-9767.1276	3	1	1.18	0.36	-1.6439	1
Cluster-1413.0	13	0	2.17	0	#NAME?	0.70033
Cluster-9767.1270	0	0	0	0	NA	NA
Cluster-9767.1273	5	6	1.29	1.43	0.20414	1
Cluster-9767.1272	14	22	1.45	2.1	0.59318	1
Cluster-9767.1279	27	47	9.29	14.96	0.74081	1
Cluster-9767.1278	3	8	0.54	1.32	1.3561	1
Cluster-9767.41618	0	1	0	6.71	Inf	1
Cluster-9767.41619	102.21	122.92	7.26	8.06	0.2112	1
Cluster-9767.41614	5	1	1.24	0.23	-2.3808	1
Cluster-9767.41615	0	0	0	0	NA	NA
Cluster-9767.41616	0	5	0	8.86	Inf	1
Cluster-9767.41617	6.27	9.02	0.68	0.9	0.52607	1
Cluster-9767.41610	23	33	4.69	6.22	0.46194	1
Cluster-9767.41611	0	0	0	0	NA	NA
Cluster-9767.41612	1	1	0.66	0.61	-0.058894	1
Cluster-9767.41613	0	7	0	1.37	Inf	1
Cluster-7184.0	0	0	0	0	NA	NA
Cluster-9894.1	4	2	1.38	0.64	-1.0589	1
Cluster-9894.0	0	0	0	0	NA	NA
Cluster-9767.29928	513	375	11.68	7.89	-0.51096	1
Cluster-9767.27661	40	59	31.82	43.28	0.50182	1
Cluster-4374.0	0	0	0	0	NA	NA
Cluster-9767.1893	33	20	9.72	5.45	-0.78136	1
Cluster-9767.27662	11	18	7.43	11.24	0.6516	1
Cluster-9767.1895	5	13	0.4	0.95	1.3196	1
Cluster-9767.27664	437.27	493.07	20.61	21.47	0.11506	1
Cluster-9767.1897	1	4	0.64	2.38	1.9411	1
Cluster-9767.27666	4.84	10.89	3.14	6.54	1.0786	1
Cluster-9767.27669	997.26	1499.24	41.33	57.38	0.52944	1
Cluster-9767.27668	405	366	17.75	14.81	-0.20497	1
Cluster-2436.0	7	5	0.86	0.57	-0.54432	1
Cluster-9767.22538	1450.52	985.28	24.03	15.08	-0.61775	1
Cluster-2559.0	5	4	1.67	1.23	-0.38082	1
Cluster-9767.22539	4393	3999	108.98	91.62	-0.19446	1
Cluster-1057.0	1.15	0	0.2	0	#NAME?	1
Cluster-9767.20366	1800.05	1558.81	74.25	59.39	-0.26627	1
Cluster-3438.1	0	1	0	0.18	Inf	1
Cluster-3438.0	1	0	3.38	0	#NAME?	1
Cluster-9767.6850	11	8	3.98	2.68	-0.51833	1
Cluster-9767.14906	0	15.53	0	0.52	Inf	0.52121
Cluster-9767.14907	43.76	17	1.63	0.58	-1.4309	1
Cluster-9767.14904	546	368	18.9	11.76	-0.62809	1
Cluster-9767.14905	6	14	11.68	24.31	1.1635	1
[truncated: 51,978 more rows]
